1 **Protease activities of vaginal *Porphyromonas* species disrupt coagulation and**  
2 **extracellular matrix in the cervicovaginal niche**

3

4

5 Karen V. Lithgow<sup>1</sup>, Vienna C.H. Buchholz<sup>1\*</sup>, Emily Ku<sup>1</sup>, Shaelen Konschuh<sup>1</sup>, Ana D'Aubeterre<sup>1†</sup>, and Laura  
6 K. Sycuro<sup>1,2,3,4,#</sup>

7

8

9 <sup>1</sup>Department of Microbiology, Immunology and Infectious Diseases, University of Calgary, Calgary, AB,  
10 Canada

11 <sup>2</sup>Snyder Institute for Chronic Diseases, University of Calgary, Calgary, AB, Canada

12 <sup>3</sup>Alberta Children's Hospital Research Institute, University of Calgary, Calgary, AB, Canada

13 <sup>4</sup>International Microbiome Centre, University of Calgary, Calgary, AB, Canada

14

15

16 #Corresponding author: Laura Sycuro, [laura.sycuro@ucalgary.ca](mailto:laura.sycuro@ucalgary.ca)

17 \*Present affiliation:

18 Faculty of Medicine & Dentistry, University of Alberta, Edmonton, AB, Canada

19 †Present affiliation:

20 Department of Biological Sciences, University of Alberta, Edmonton, AB, Canada

21

22 *Running Title:* Protease activity of vaginal *Porphyromonas* species

23

24 Abstract: 240 words

25 Importance: 141 words

26 Main Text: 7540 words

27 **Abstract**

28 *Porphyromonas asaccharolytica* and *Porphyromonas uenonis* are frequently isolated from the human  
29 vagina and are linked to bacterial vaginosis and preterm labour. However, little is known about the  
30 pathogenesis mechanisms of these bacteria. The related oral opportunistic pathogen, *Porphyromonas*  
31 *gingivalis*, is comparatively well-studied and known to secrete numerous extracellular matrix-targeting  
32 proteases. Among these are the gingipain family of cysteine proteases that drive periodontal disease  
33 progression and hematogenic transmission to the placenta. Given their phylogenetic relatedness, we  
34 hypothesized that vaginal *Porphyromonas* species possess gingipain-like protease activity targeting  
35 host extracellular matrix in the female reproductive tract. In this study, we demonstrate that vaginal  
36 *Porphyromonas* species degrade type I collagen (cervix), type IV collagen (chorioamnion/placenta),  
37 and fibrinogen, but not through the activity of gingipain orthologs. Bioinformatic queries identified 5  
38 candidate collagenases in each species, including serine, cysteine and metalloproteases, with signal  
39 peptides directing them to the extracellular environment. Inhibition assays revealed both species  
40 secrete metalloproteases that degrade collagen and casein, while *P. asaccharolytica* also secretes a  
41 metalloprotease that degrades fibrinogen. Phylogenetic analysis of the predicted collagen-degrading  
42 metalloprotease revealed an orthologous relationship with the *P. gingivalis* endopeptidase PepO.  
43 Cloning and expression of *P. asaccharolytica* PepO confirmed this protein's collagenase and caseinase  
44 activities, which have not previously been attributed to PepO homologs in other bacteria. Altogether,  
45 this description of the first known virulence factor in *Porphyromonas* species colonizing the human  
46 vagina sheds light on their potential to alter the structural integrity and homeostasis of reproductive  
47 tissues.

48

49

50

51

52

53

54 **Importance**

55 *Porphyromonas* species are common inhabitants of the vaginal microbiome, but their presence has  
56 been linked to adverse health outcomes for women, including bacterial vaginosis and preterm birth. We  
57 determined that *P. asaccharolytica* and *P. uenonis* secrete broad-acting proteases capable of freely  
58 diffusing within the cervicovaginal niche and degrading important components of host tissues, namely  
59 the extracellular matrix. We show that secreted *Porphyromonas* proteases degrade collagens that are  
60 enriched within the cervix (type I) and chorioamniotic membranes (type IV). Furthermore, these  
61 *Porphyromonas* proteases can also degrade fibrinogen and inhibit clot formation. These activities can  
62 be partially attributed to a metalloprotease that exhibits broad-acting protease activity and is distantly  
63 related to the *P. gingivalis* endopeptidase PepO. This initial characterization of virulence activities in  
64 vaginal *Porphyromonas* species highlights their potential to harm human pregnancy through clotting  
65 disruption, fetal membrane weakening, and premature cervical remodeling.

66

67

68

69

70

71

72

73

74

75

76

77

## 78 Introduction

79 The vaginal microbiome of healthy reproductive-age women is typically characterized by low species  
80 diversity, with *Lactobacillus* dominating the vaginal and ectocervical niches of the lower genital tract (1,  
81 2). A community shift towards high species diversity, with overgrowth of anaerobic bacteria, is  
82 associated with increased risk of bacterial vaginosis (BV) (2, 3), acquisition and transmission of  
83 sexually transmitted infections (4-6), preterm birth (7-9), and cervical cancer (10-12). Intriguingly, some  
84 women harbouring a diverse cervicovaginal microbiome are healthy and asymptomatic (2), suggesting  
85 a need to untangle how specific species contribute to poor outcomes. Among BV-associated bacteria,  
86 Gram-negative anaerobic rods corresponding to *Prevotella* and black-pigmented *Porphyromonas*  
87 species are frequently detected in vaginal samples and significantly associated with the *Bacteroides*  
88 morphotype from Nugent scoring (13). While *Prevotella* is an abundant, species-rich and relatively well-  
89 studied vaginal clade, comparatively little is known about *Porphyromonas* species inhabiting the human  
90 vagina. No *Porphyromonas* species is currently thought to be specific to the human urogenital tract, but  
91 *P. asaccharolytica*, *P. uenonis*, *P. bennonis* and *P. somerae* (in decreasing order of cervicovaginal  
92 microbiome citation frequency) exhibit a preference for these niches (3, 14, 15). *P. asaccharolytica* and  
93 *P. uenonis* colonize the vagina in 15–50% of healthy women and although their prevalence and  
94 abundance increases with BV, they are typically considered low abundance taxa (13, 16-20). Recent  
95 studies show these species are predictors of spontaneous preterm labour (9, 21), pelvic inflammatory  
96 disease (22, 23), human papillomavirus (HPV) infections progressing to cervical neoplasia (24, 25), and  
97 uterine cancer (26, 27). Thus, an improved understanding of the functional capacity of vaginal  
98 *Porphyromonas* species is needed.

99 To date, the only *Porphyromonas* species that has been well-characterized is *P. gingivalis*, a  
100 low abundance species in the oral microbiome of both healthy patients and those with gingivitis (28,  
101 29). As a keystone species driving oral (plaque) biofilm formation and periodontal disease progression  
102 (30, 31), *P. gingivalis* contributes to local tissue destruction directly and indirectly through the induction  
103 of inflammatory processes (32, 33). *P. gingivalis* can also disseminate via the bloodstream to distal  
104 infection sites such as the endocardium and joints (34, 35). During pregnancy, *P. gingivalis* has been

105 isolated from the placenta and amniotic fluid of women who delivered preterm (36-38), and in mouse  
106 infection models, *P. gingivalis* induces preterm labour via inflammatory activation of the chorioamniotic  
107 membranes (34, 39, 40). Pathogenesis mechanisms contributing to these outcomes include a wide  
108 array of proteolytic activities carried out by numerous secreted proteases. Among these are the  
109 gingipain family of cysteine proteases that drive periodontal disease progression (41), hematogenic  
110 transmission to the placenta (29, 40, 42, 43) and preterm labour induction in mice (40). The gingipains  
111 degrade many extracellular matrix components, including collagen (44, 45), and amplify their effects by  
112 activating and upregulating host matrix metalloproteases (MMPs) that also degrade collagen (46, 47).  
113 Furthermore, gingipains can degrade immune factors including immunoglobulins (44, 48), complement  
114 components (49, 50), cytokines (51, 52), clotting factors (53, 54), and antimicrobial peptides (55), giving  
115 rise to a favourable immune environment for *P. gingivalis* colonization.

116 Proteolytic activity has been previously detected in vaginal fluid from patients with BV (56-58)  
117 and characterized in clinical isolates of BV-associated bacteria (59, 60). In fact, collagenase  
118 (gelatinase) and caseinase activity of *P. asaccharolytica* (formerly *Bacteroides asaccharolyticus*) was  
119 previously reported in screens of *Bacteroides* species detected in human infections (61) and clinical  
120 isolates from reproductive tract infections (60). However, further characterization of the enzymes  
121 responsible was not conducted, and proteolytic activity of *P. uenonis* has yet to be explored. Given their  
122 phylogenetic relatedness and epidemiological similarity, exhibiting high prevalence, low abundance and  
123 association with disease, we sought to determine whether vaginal *Porphyromonas* species possess the  
124 broad-acting proteolytic virulence activity of *P. gingivalis*. In this study we show that *P. asaccharolytica*  
125 and *P. uenonis* are both capable of degrading several extracellular matrix components found within the  
126 female genital tract. Our study furthermore reveals differences between the species, suggesting  
127 preterm birth-associated *P. asaccharolytica* may secrete more enzymes that contribute collagenase  
128 activity. Finally, we report the first virulence factor identified and functionally characterized in *P.*  
129 *asaccharolytica* – a metalloprotease that is highly conserved in *P. uenonis* and more distantly related to  
130 to the PepO endopeptidase in *P. gingivalis* and other *Porphyromonas* species (62, 63). We

131 demonstrate this protein exhibits broad-acting proteolytic capacity, which may make it a key microbial  
132 virulence factor in the pathogenesis of reproductive health conditions and gynecological cancers.

133

134

135

136

137

138

139

140

141

142

143

144

145

146

147

148

149

150

151

152

153

154

155

156

157

158 **Materials & Methods**

159 **Bacterial Strains and Growth Conditions.** *Porphyromonas asaccharolytica* CCUG 7834 (type strain,  
160 identical to DSM 20707, ATCC 25260 and JCM 6326), *Porphyromonas uenonis* CCUG 48615 (type  
161 strain, identical to DSM 23387, ATCC BAA-906 and JCM 13868), *Porphyromonas gingivalis* W50  
162 ATCC 53978 and *Lactobacillus crispatus* CCUG 42897 were cultured anaerobically on 1.5% brucella  
163 agar (BD Biosciences, Franklin Lakes, MD) supplemented with 5% defibrinated sheep's blood (Dalynn  
164 Biologicals, Calgary, AB). For liquid cultivation, supplemented brain heart infusion (sBHI) was prepared  
165 by supplementing BHI (BD) with 2% gelatin (BD), 1% yeast extract (ThermoFisher Scientific, Burnaby,  
166 BC), 0.8% dextrose (BD) and 0.1% starch (ThermoFisher). Solid and liquid cultivation was conducted  
167 at 37°C in an AS-580 anaerobic chamber (Anaerobe Systems, Morgan Hill, CA). Bacterial suspensions  
168 were prepared by harvesting cells from solid medium after growth for 16-24 hours (*P. gingivalis*, *L.*  
169 *crispatus*) or 36-48 hours (*P. asaccharolytica*, *P. uenonis*) and resuspending cells in sBHI, sBHI (no  
170 gelatin), BHI (no supplements) or PBS. Optical density at 600 nm (OD600) of bacterial suspensions  
171 was measured with a Genesys 300 visible spectrophotometer (ThermoFisher Burnaby, BC) and colony  
172 forming units per mL (cfu/mL) was calculated using empirically determined cfu/mL/OD600nm for each  
173 strain. Serial dilution spot plating was used to verify the cfu/mL of the starting suspensions. Cell-free  
174 supernatants (SNs) were harvested during late-log to early stationary phase for each species (*P.*  
175 *asaccharolytica* OD600 1.3-1.8; *P. uenonis* OD600 0.8-1.2). Liquid cultures were centrifuged at 10,000  
176 × g for 10 minutes at room temperature before the supernatant was filter sterilized (0.2 µm; Pall  
177 Laboratory, Mississauga, ON) and stored at -20°C.

178

179 **Collagenase Assays.** Cell suspensions or cell-free supernatants were tested for collagenase activity  
180 with the EnzChek Gelatinase/Collagenase assay kit (Invitrogen, Carlsbad, CA) using fluorescein-  
181 labelled DQ™ gelatin conjugate (type I collagen, Invitrogen) or a type IV DQ™ collagen conjugate from  
182 human placenta (Invitrogen). Reactions were prepared in technical triplicate or quadruplicate by mixing  
183 20 µL of substrate at 0.25 mg/mL with 80 µL of reaction buffer and 100 µL of bacterial suspension, cell-  
184 free supernatant or media in black optical bottom 96-well plates (Greiner Bio-One, Monroe, NC). Using

185 a Synergy H1 microplate reader (BioTek, Winooski, VT), plates were incubated at 37°C in atmospheric  
186 conditions. Kinetic fluorescence reads were measured at 485 nm excitation/527 nm emission every  
187 three minutes over two hours, or every thirty minutes over eighteen hours, for cell suspension and cell-  
188 free supernatant assays, respectively. Prior to fluorescence reads, plates were shaken for seven  
189 seconds. The mean fluorescence readings of the negative control (substrate in sBHI media) were  
190 subtracted from experimental wells and relative fluorescence units (RFU) was plotted over time, with  
191 negative values adjusted to zero.

192

193 **Zymography.** The total protein content of *Porphyromonas* cell-free supernatants was determined using  
194 a bicinchoninic acid microplate assay (BCA; Pierce, Rockford, IL). Cell-free supernatants were diluted  
195 to 8 mg/mL and 5 µL of sample was combined with 5 µL of Novex™ Tris-Glycine SDS Sample Buffer  
196 (Invitrogen) to load 40 µg per well. Samples were separated on Novex™ 10% Zymogram Plus (Gelatin;  
197 Invitrogen) protein gels at a constant voltage of 125 V in Novex™ 1X Tris-Glycine Running Buffer  
198 (Invitrogen). After separation, gels were incubated in Novex™ 1X Renaturing Buffer for 30 minutes at  
199 room temperature with gentle agitation, followed by two consecutive incubations in Novex™ 1X  
200 Developing Buffer: room temperature for 30 minutes and 37°C for 16 hours. Gels were then stained in  
201 Coomassie brilliant blue R-250 solution (Fisher Scientific) and de-stained in 5% (vol/vol) methanol/7.5%  
202 (vol/vol) acetic acid in distilled water.

203

204 **Caseinase Assay.** *Porphyromonas* cell-free supernatants were tested for general protease activity  
205 using fluorescein-labelled casein (FITC-Casein, ThermoFisher) as a substrate. Reactions were  
206 prepared in technical triplicate by mixing 20 µL of substrate at 50 µg/mL with 80 µL of Tris-buffered  
207 saline and 100 µL of cell-free supernatant in black optical bottom 96-well plates (Greiner Bio-One).  
208 Fluorescence plate reader measurements were performed as described above by measuring 485 nm  
209 excitation/527 nm emission every ten minutes over five hours.

210



211 **Casein Plate Assay.** Casein plates were prepared by autoclaving three solutions: 30 g/L instant skim  
212 milk power (Pacific Dairy), 19 g/L brain heart infusion (BHI, BD Biosciences) and 30 g/L agar (Fisher  
213 Scientific). The solutions were combined in equal volume and 10 mL was added to 100x15 mm petri  
214 dishes (Fisher Scientific) to solidify at room temperature. Bacterial suspensions were prepared in PBS  
215 and 5  $\mu$ L was spotted onto casein agar plates. Zones of clearance were measured for each spot after  
216 incubating the plates at 37°C under anaerobic conditions for three to six days.

217  
218 **Clotting Assays.** Bacterial strains were harvested from solid medium and suspended in 13 mM sodium  
219 citrate. Suspensions were centrifuged at 10,000  $\times$  g for 7 minutes at room temperature and  
220 resuspended in 13 mM sodium citrate. Duplicate cell suspensions, or cell-free controls, were incubated  
221 with 50  $\mu$ L of sterile filtered bovine plasma (Quad Five, Ryegate, MT) for 30 minutes at 37°C under  
222 anaerobic conditions. After incubation, samples were blinded and centrifuged at 10,000  $\times$  g for seven  
223 minutes at room temperature, and 50  $\mu$ L of HEMOCLOT thrombin time reagent (Hyphen Biomed,  
224 Neuville-sur-Oise, France) was added to each reaction. The clotting time for each sample was  
225 estimated using a stereo microscope to directly visualize clot formation, indicated by the presence of  
226 white precipitate, tendril formation or increased viscosity of the samples. The clotting time for samples  
227 that did not form visible clots was recorded as 1800 seconds. To further evaluate final clot size,  
228 samples were transferred to a clear 96-well plate and OD (405 nm) was measured for the entire well  
229 using the well area scan feature of the Synergy H1 microplate reader (BioTek). The average OD405 nm  
230 for each well was blanked against duplicate thrombin-free controls for each experimental sample type.

231  
232 **Fibrinogen Degradation Assay.** *Porphyromonas* cell suspensions ( $10^7$  cfu/reaction), sBHI media  
233 controls or *Porphyromonas* cell-free supernatants (240  $\mu$ g of total protein) were incubated with 120  $\mu$ g  
234 of human fibrinogen (Sigma-Aldrich, St. Louis, MO). Reaction mixtures were incubated at 37°C under  
235 anaerobic conditions or in an atmosphere of 5% CO<sub>2</sub> for cell suspension or cell-free supernatants,  
236 respectively. Samples from each time point (cell suspensions: 0, 2, 18, 24 hours; supernatants: 0, 2,  
237 24, 48 hours) were collected, mixed 1:1 with Novex™ 2X sample buffer (Invitrogen) with dithiothreitol

238 (DTT, Fisher Scientific), heated at 95°C for 10 minutes and separated on Novex™ 10% Tris-Glycine  
239 polyacrylamide pre-cast gels (Invitrogen) at a constant voltage of 180 V. Gels were stained in  
240 Coomassie brilliant blue R-250 (0.25% w/v) solution (Fisher Scientific) and de-stained in 5% (vol/vol)  
241 methanol/7.5% (vol/vol) acetic acid in H<sub>2</sub>O. Fibrinogen degradation was evaluated qualitatively by  
242 visualization of fibrinogen  $\alpha$  chain (63.5 kDa),  $\beta$  chain (56 kDa) and  $\gamma$  chain (47 kDa) between  
243 experimental and control samples over the time-course.

244

245 **Protease Inhibition Assays.** Protease inhibitors were incorporated into collagenase, caseinase and  
246 fibrinogen degradation assays, and working solutions were prepared in reaction buffer or TBS. The  
247 metalloprotease inhibitor, 1,10-Phenanthroline (Invitrogen), was prepared as a 2 M stock solution in  
248 ethanol and diluted to working concentrations of 0.2, 0.02 or 0.002 mM. Iodoacetamide (G-Biosciences,  
249 St. Louis, MO, or Sigma-Aldrich) was prepared as a 10 mM stock solution in HyPure H<sub>2</sub>O (Cytiva Life  
250 Sciences, Marlborough, MA) and used at working concentrations of 0.4, 0.04 or 0.004 mM to inhibit  
251 cysteine protease activity. The serine protease inhibitor, aprotinin (Roche, Mississauga, ON) was  
252 prepared as a 0.1 mM stock solution in HyPure H<sub>2</sub>O (Cytiva Life Sciences) and used at working  
253 concentrations of 0.01, 0.001 or 0.0001 mM.

254

255 **Bioinformatic Analyses. Gingipain Ortholog Queries.** Gingipain amino acid sequences (RgpA  
256 (PGN\_1970; P28784), RgpB (PGN\_1466; P95493) and Kgp (PGN\_1728; B2RLK2) were obtained from  
257 *Porphyromonas gingivalis* ATCC 33277 through UniProtKB. Each sequence was queried against all  
258 available *P. asaccharolytica* (DSM 20707; PR426713P-I) and *P. uenonis* (DSM 23387; 60-3) genomes  
259 using the 'Selected Genomes' protein Basic Local Alignment Search Tool (BLAST; default settings) in  
260 the IMG/MER database to identify potential orthologs (Supplemental Figure 1A). Each gingipain AA  
261 sequence was also submitted to the Pfam database and all Pfam IDs and names were recorded.  
262 Gingipain Pfam IDs were searched against all available *P. asaccharolytica* (DSM 20707; PR426713P-I)  
263 and *P. uenonis* (DSM 23387 [IMG Genome ID 2585427891 and 2528311143]; 60-3) strains using the  
264 advanced gene search function in the IMG/MER database (Supplemental Figure 5A). All sequences

265 returned by these IMG/MER BLAST and Pfam ID searches were used to query *P. gingivalis* ATCC  
266 33277 in a reciprocal BLAST search with the National Center for Biotechnology Information (NCBI)  
267 protein BLAST tool (Supplemental Figure 1A). Select hits were aligned with the *P. gingivalis* gingipains  
268 across their full length using the EMBL-EMI Clustal Omega alignment tool (64).

269

270 *Candidate Collagenase Queries.* Peptidases from *P. asaccharolytica* CCUG 7834 and *P. uenonis* 60-3  
271 were identified by searching for entries with MEROPS peptidase annotations in UniProt (65). For the  
272 microbial peptidases from *P. asaccharolytica* and *P. uenonis*, the following enzyme information was  
273 exported from UniProtKB for each entry: gene ontology (biological process and molecular function),  
274 MEROPs, Pfam, PANTHER, PROSITE, SMART, SUPFAM. Next, a microbial collagenase enzyme  
275 number (EC3.4.24.3) was identified in BRENDA (66) and searched against the UniProtKB database  
276 (67), generating a list of 3417 entries corresponding to predicted and confirmed microbial collagenases.  
277 These microbial collagenase identifiers were cross-referenced against the exported peptidase  
278 information from *P. asaccharolytica* and *P. uenonis* to generate a short-list of 14–18 candidate  
279 collagenases in *P. asaccharolytica* and *P. uenonis* (Supplemental Figure 1B). Short-list candidates  
280 were explored in UniProt and InterPro Scan (68) to eliminate any proteins involved in cell wall synthesis  
281 or export machinery and identify the most promising candidates. Sequences were evaluated for the  
282 presence of secretion signals using SignalIP v.5.0 (69) or integrated information in InterPro. Presence of  
283 the IDs: TIGR0483, IPR026444, or PF18962 from TIGR Fam, InterPro and Pfam, respectively, within  
284 protein C-termini was indicative of secretion via the type IX secretion system. Since the MEROPs  
285 peptidase database only contained information for *P. uenonis* 60-3, IMG BLAST searches were used to  
286 identify the corresponding candidate collagenase in the experimental strain used in this study, *P.*  
287 *uenonis* CCUG 48615. Sequence identity and InterPro scans were evaluated for the top hit from each  
288 BLAST search in *P. uenonis* CCUG 48615 (Supplemental Table 6).

289

290 *Phylogenetic Analysis.* 16S rRNA gene sequences were collected using the Integrated Microbial  
291 Genomes & Microbiomes (IMG/MER) (70) or National Center for Biotechnology Information (NCBI)

292 databases for each *Porphyromonas* species reported in the human urogenital tract by Acuna-Amador in  
293 their comprehensive review (14). Uncultured and recently cultured *Porphyromonas* species were also  
294 included (71, 72). Nomenclature choices were informed by the ANI tool within IMG/MER and the  
295 Genome Taxonomy Database (GTDB, Release 06-RS202, April 27<sup>th</sup>, 2021) (73). Whenever possible,  
296 type strain and near full-length sequences were selected. Multiple sequence alignment was performed  
297 with SINA aligner (v.1.2.11) (74) using Silva's Alignment, Classification and Tree Service (ACT) (75).  
298 The phylogenetic tree was computed using RAxML v.8.2.9 (76) with the Gamma model for likelihoods  
299 (also through ACT). The tree was edited using the interactive Tree of Life (iTOL (77)). The AA identity  
300 of PepO orthologues in each *Porphyromonas* species was queried through BLASTP searches in  
301 IMG/MER and NCBI using the *P. asaccharolytica* AA sequence as the query. With the exception of *P.*  
302 *uenonis* 60.3, the AA identity reported corresponds with a hit showing >98% query coverage.

303

#### 304 **Construct cloning and *in vitro* transcription/translation**

305 The Poras\_0079 (PepO; IMG Gene ID 2504823953) DNA fragment encoding amino acid residues C21  
306 to W682 was PCR amplified from a *P. asaccharolytica* DSM 20707 genomic DNA extraction (Qiagen  
307 DNeasy Blood & Tissue Kit, Germantown, MD) using the forward (5'-  
308 ATATCCATGGCTTGTAACAAGAAGCAGGAGAATC-3') and reverse primers (5'-  
309 ATATCCCGGGCCAGACCACGACACGCTC-3'). The amplicon was cloned into the pTXTL-T7p14-aH  
310 plasmid (replacing alpha hemolysin, Daicel Arbor Biosciences, Ann-Arbor, MI) using NcoI-HF and SmaI  
311 (New England Biolabs, Ipswich, MA). The new plasmid construct (pSLP15) was transformed into  
312 *Escherichia coli* DH5 $\alpha$  chemically competent cells and prepped using the QIAprep spin miniprep kit  
313 (Qiagen). Plasmid concentrations were determined using the Qubit dsDNA broad range assay kit with a  
314 Qubit 3 fluorometer (Invitrogen). *In vitro* myTXTL reactions were prepared by combining 5 nM of  
315 pSLP15, 1 nM of pTXTL-P70a-T7map (expressing the T7 RNA polymerase, Daicel Arbor BioSciences,  
316 Ann-Arbor, MI) and 9  $\mu$ L of myTXTL Sigma 70 Master Mix (Arbor Biosciences) to a final volume of 12  $\mu$ L  
317 with HyClone HyPure water H<sub>2</sub>O (Cytiva); negative controls included 1 nM pTXTL-P70a-T7map and  
318 myTXTL Sigma 70 Master Mix only. For each reaction, 10  $\mu$ L was transferred to a PCR-clean

319 polypropylene V bottom 96-well plate and covered with a silicone seal (Eppendorf, Mississauga, ON).  
320 Reactions were incubated at 29°C for 16 hours and final reactions stored at -20°C. To assess  
321 proteolytic activity, control (RNAP only) and PepO reactions were incorporated into fluorescent  
322 caseinase assays and collagenase assays. For caseinase assays, TXTL reactions were diluted 60-fold  
323 in TBS and 10 µL was added to each well. For type I and type IV collagenase assays, 10 µL of  
324 undiluted TXTL reactions were added to each well. Caseinase and type I collagenase assays were also  
325 conducted in the presence of 0.5 mM 1,10-phenanthroline. Mean fluorescence readings of the negative  
326 control (substrate with RNAP TXTL reaction) were subtracted from the experimental wells and relative  
327 fluorescence units (RFU) was plotted over time, with negative values adjusted to zero.

328

329 **Statistical Analyses.** Statistics were performed in GraphPad Prism or Stata and graphs were prepared  
330 in GraphPad. GraphPad was used to assess data variance and normality (Shapiro-Wilk test) and  
331 statistical significance was evaluated as described in figure legends. All schematic illustrations were  
332 created with BioRender.com.

333

334

335

336

337

338

339

340

341

342

343

344

345 **Results**

346 **Vaginal *Porphyromonas* species degrade type I collagen, type IV collagen and casein using**  
347 **secreted proteases**

348         Given their phylogenetic relatedness to the periodontal pathogen, *P. gingivalis*, we sought to  
349 understand whether the two *Porphyromonas* species most frequently detected in the human vagina, *P.*  
350 *asaccharolytica* and *P. uenonis*, possess gingipain-like protease activities (14). Collagenase activity  
351 was evaluated using fluorescently quenched substrates (type I collagen or type IV collagen), where  
352 proteolytic digestion results in dequenching and measurable increases in fluorescence over time.  
353 Fluorometric collagenase assays confirmed that *P. asaccharolytica* and *P. uenonis* cell suspensions  
354 degrade type I collagen in a dose-dependent manner (Figure 1A). Next, collagenase activity was  
355 measured in cell-free supernatants from *P. asaccharolytica* and *P. uenonis*. These experiments  
356 validated that both organisms secrete proteases capable of degrading type I and type IV collagen  
357 (Figure 1B–C). Collagenase activity was further confirmed with gelatin zymography (Supplemental  
358 Figure 2), where *P. asaccharolytica* supernatants produced three distinct high molecular weight zones  
359 of clearing (~85 kDa, 95 kDa, 120 kDa), while *P. uenonis* supernatants generated four separate zones  
360 of clearing in the gel: three high molecular weight (~75 kDa, 90 kDa, 110 kDa) and one low molecular  
361 weight (30 kDa). Next, casein degradation was monitored to evaluate general proteolytic activity of *P.*  
362 *asaccharolytica* and *P. uenonis* secreted proteases. Due to its low-complexity tertiary structure, casein  
363 is regarded as a universal protease substrate that is highly susceptible to proteolytic degradation.  
364 Fluorometric assays revealed that supernatants from *P. asaccharolytica* and *P. uenonis* possess  
365 caseinase activity (Figure 2D). This was further confirmed using agar-based casein degradation  
366 assays, where *P. asaccharolytica*, *P. uenonis* and *P. gingivalis* cell suspensions all produced zones of  
367 clearing (Supplemental Figure 3). Although *P. asaccharolytica* and *P. uenonis* can degrade similar  
368 substrates to *P. gingivalis* (41), *P. gingivalis* showed substantially higher maximum fluorescence and  
369 area under the curve for collagen degradation from cell suspensions and secreted proteases  
370 (Supplemental Figure 4, Supplemental Table 1, Supplemental Table 2). The area under the curve for  
371 casein degradation by *P. gingivalis* was also much higher than for *P. asaccharolytica* or *P. uenonis*,

372 while the maximum fluorescence and time to maximum fluorescence for casein degradation were  
373 comparable between all three *Porphyromonas* species (Supplemental Figure 4C, Supplemental Table  
374 2). To understand if proteolytic activity might contribute to pathogenesis in the female genital tract, we  
375 evaluated whether a common commensal vaginal microbe is also capable of degrading collagen and  
376 casein. No collagenase or caseinase activity was detected from *Lactobacillus crispatus* cell  
377 suspensions in the fluorometric collagenase or caseinase assays (Supplemental Figure 5), suggesting  
378 that proteolytic activity could be a pathogenesis mechanism for opportunistic pathogens in the vaginal  
379 niche.

380

### 381 ***P. asaccharolytica* and *P. uenonis* inhibit fibrin clot formation through fibrinogen degradation**

382 Since gingipains are known to degrade fibrinogen and exacerbate gum bleeding (41), we next  
383 investigated whether *P. asaccharolytica* and *P. uenonis* proteases can degrade fibrinogen and impair  
384 fibrin clot formation. To evaluate direct fibrinogen degradation, cell-free media controls and cell  
385 suspensions of *P. asaccharolytica* or *P. uenonis* were incubated in the presence and absence of  
386 human fibrinogen over a 24-hour time course. Samples removed at defined intervals were separated by  
387 SDS-PAGE and stained with Coomassie Brilliant Blue. In cell-free media controls, the fibrinogen  $\alpha$ ,  $\beta$   
388 and  $\gamma$  chains remained intact throughout the experiment and, as expected, fibrinogen chains were  
389 absent from '*P. asaccharolytica* no Fg' and '*P. uenonis* no Fg' controls (Figure 2A–B). When *P.*  
390 *asaccharolytica* or *P. uenonis* were incubated with fibrinogen, complete degradation of the fibrinogen  $\alpha$   
391 and  $\beta$  chains was observed after 18 hours, while the  $\gamma$  chain remained intact (Figure 2A–B). To  
392 determine whether fibrinogen degradation translates to impaired fibrin clotting, thrombin-induced fibrin  
393 clot formation was measured after *Porphyromonas* cell suspensions were pre-incubated with citrated  
394 plasma. A significant delay in clot formation was observed with the highest dose of *P. asaccharolytica*  
395 or *P. uenonis* ( $9.0 \times 10^9$  cfu/reaction) compared to the no cell control (Figure 2C, \*\*\*\*  $p < 0.0001$ ) or a  
396 lower dose of *P. asaccharolytica* or *P. uenonis* (Figure 2C; \*\*\*\*  $p < 0.0001$  vs.  $1.5 \times 10^8$ ). Turbidimetry at  
397 the experimental endpoint (30 minutes) allowed for quantitative evaluation of final clot size. In keeping  
398 with clotting times from Figure 2C, fibrin clot size was significantly reduced in samples exposed to *P.*

399 *asaccharolytica* or *P. uenonis* at  $9.0 \times 10^9$  cfu/reaction compared with the no cell control (Figure 2D \*\*\*\*  
400  $p < 0.0001$ ). For *P. asaccharolytica*, a significant reduction in clot size was observed in samples treated  
401 with  $9.0 \times 10^9$  cfu/reaction when compared to  $1.5 \times 10^8$  cfu/reaction (Figure 2D, \*\*\*  $p < 0.0003$ ). Similarly,  
402 clot sizes in samples treated with the highest dose of *P. uenonis* ( $9.0 \times 10^9$  cfu/reaction) were  
403 significantly smaller than samples treated with a lower doses of *P. uenonis* (Figure 2D vs.  $1.5 \times 10^8$   
404 cfu/reaction \*\*  $p = 0.003$ ). These findings were further confirmed by visual assessment of clot formation  
405 at assay endpoints (Figure 2E). Taken together, these results show that *P. asaccharolytica* and *P.*  
406 *uenonis* impair clot formation through proteolytic degradation of fibrinogen.

407

### 408 **Vaginal *Porphyromonas* species do not encode gingipain orthologs**

409 Given the gingipain-like proteolytic activity observed in *P. asaccharolytica* and *P. uenonis*  
410 (Figures 1–2), we sought to confirm an earlier report that these organisms do not encode gingipain  
411 orthologs (78). Using BLASTP, gingipain protein sequences (RgpA, RgpB, Kgp) were queried against  
412 *P. asaccharolytica* and *P. uenonis* genomes (Supplemental Figure 6A), yielding zero hits in *P.*  
413 *asaccharolytica* and two hits in each *P. uenonis* 23387 genome (IMG Genome ID 2585427891 and  
414 2528311143); of note, these *P. uenonis* genomes were not queried in the previous analysis (78). No  
415 BLASTP hits were identified in *P. uenonis* 60-3 as previously reported (78). One hit resulted from the  
416 Kgp BLAST search only (Supplemental Table 3; L215DRAFT\_00230/JCM13868DRAFT\_00677; 27%  
417 sequence identity) and another hit resulting from both the Kgp and RgpA BLAST queries (Supplemental  
418 Table 3; L215DRAFT\_00128/JCM13868DRAFT\_01423; 26–27% sequence identity). We further  
419 considered whether secreted proteases in *P. asaccharolytica* and *P. uenonis* share protein domains  
420 with gingipains. Evaluation of protein families (Pfams) in the gingipains revealed four conserved protein  
421 family (Pfam) domains, with RgpB containing one additional Pfam not found in RgpA or Kgp  
422 (Supplemental Table 4). All five Pfams were searched against all available genomes of *P.*  
423 *asaccharolytica* and *P. uenonis* to identify proteins containing gingipain Pfams (Supplemental Figure  
424 6A). The peptidase C25 family (PF01364) search resulted in one hit in each of the genomes queried,  
425 while the cleaved adhesin domain (PF07675) returned hits in all *P. uenonis* strains, but none in *P.*



426 *asaccharolytica* (Supplemental Table 4). To determine whether any hits from the BLAST search  
427 (Supplemental Table 3) and Pfam search (Supplemental Table 4) are gingipain orthologs, we  
428 performed a reciprocal BLASTP search against *P. gingivalis* (Supplemental Figure 6A). The C25  
429 peptidase-containing proteins identified in the Pfam search against *P. asaccharolytica* (Poras\_0230)  
430 and *P. uenonis* (L215DRAFT\_00971) displayed the highest percent identity with the gingipains. When  
431 these sequences were queried against *P. gingivalis* using BLASTP, PGN\_0022 emerged as the only  
432 significant hit with 36-37% identity and 97% query coverage (Supplemental Table 5). Since PGN\_0022  
433 has been characterized as PorU, the type 9 secretion sortase enzyme in *P. gingivalis* (79), the C25  
434 peptidase-containing proteins identified in *P. asaccharolytica* and *P. uenonis* are likely to function as  
435 PorU orthologs rather than gingipains. Querying the cleaved adhesin domain-containing proteins from  
436 *P. uenonis* against *P. gingivalis* revealed two uncharacterized proteins: PGN\_1611 and PGN\_1733 as  
437 the top BLASTP hits (Supplemental Table 5). The Lys-gingipain (Kgp) was identified as fourth hit from  
438 both *P. uenonis* cleaved adhesin domain-containing protein BLASTP searches (Supplemental Table 5),  
439 but the percent identity and coverage are restricted to the shared pfam. Furthermore, results from  
440 multiple sequence alignments with the *P. gingivalis* gingipains showed  $\leq 20\%$  identity for all *P.*  
441 *asaccharolytica* and *P. uenonis* sequences. In summary, since all BLASTP alignments were less than  
442 200 residues, full length alignments of query and subject sequences were  $\leq 20\%$ , reciprocal BLASTP  
443 searches did not return *P. gingivalis* gingipains as top hits, and our Pfam search did not identify *P.*  
444 *asaccharolytica* or *P. uenonis* proteins that appear to be gingipains, we concluded that these vaginal  
445 *Porphyromonas* species do not encode gingipain orthologs.

446

#### 447 **Identification of collagenase candidates in *P. asaccharolytica* and *P. uenonis***

448 To identify other candidate proteins that may be responsible for the collagenolytic activity of  
449 vaginal *Porphyromonas* species, we first queried the MEROPs database (65) uncovering 59 and 63  
450 known and predicted peptidases from *P. asaccharolytica* and *P. uenonis*, respectively. To identify  
451 putative collagenase enzymes from this list, we cross-referenced these peptidases with a list of protein  
452 annotation identifiers from known and predicted microbial collagenases in the BRENDA enzyme

453 information database (66). This approach shortened the candidate peptidase list to 18 enzymes in *P.*  
454 *asaccharolytica* and 14 in *P. uenonis*. InterPro scans of each putative collagenase revealed proteins  
455 likely to be involved in cell wall synthesis or export machinery and narrowed the list to ten peptidases in  
456 *P. asaccharolytica* and nine peptidases in *P. uenonis* (Supplemental Figure 6B). Factoring in similarity  
457 to characterized collagenases, additional domains identified in InterPro and the presence of secretion  
458 signals, a final short list of the seven most promising candidate peptidases in each organism was  
459 generated (Table 1). Intriguingly, each organisms' candidate collagenases could be organized into four  
460 groups: Ig-containing serine proteases (2x), C10 cysteine proteases (2x), M13 metalloproteases (1x)  
461 and U32 proteases (2x) (Table 1). Multiple sequence alignments of candidate collagenase pairs for a  
462 given type within each strain revealed low sequence identity (29%–45% (Table 1)). Conversely, BLAST  
463 searches between species allowed for identification of orthologous protein pairs in *P. asaccharolytica*  
464 and *P. uenonis*, with sequence identity ranging from 67% up to 100% (Table 1). Taken together, this  
465 suggests that within-genome pairs of candidate collagenases are likely to have resulted from a gene  
466 duplication event prior to speciation of *P. asaccharolytica* and *P. uenonis*.

467 Serine proteases within the short list all contained Ig-like folds (Table 1), which are also present  
468 in the binding domain of the well-characterized collagen degrading metalloproteases from *Clostridium*  
469 *histolyticum* (ColG, ColH) (80). The candidate cysteine proteases contained type 9 secretion system  
470 signal domains and a SpeB domain (Table 1), indicating sequence similarity with *Streptococcus*  
471 *pyogenes* streptopain, a cysteine protease capable of cleaving host components such as fibrinogen,  
472 immunoglobulins and complement proteins (81-83). The candidate metalloproteases from *P.*  
473 *asaccharolytica* (Poras\_0079) and *P. uenonis* (Poru\_00076) each contained a catalytic collagenase  
474 domain in addition to an M13 type metallopeptidase domain and a predicted N-terminal secretion signal  
475 (Table 1). Finally, two U32 collagenases were detected in each vaginal *Porphyromonas* species  
476 indicating an orthologous relationship with the *P. gingivalis* U32 collagenase PrtC (84, 85). Of note,  
477 none of these putative U32 collagenases were found to possess secretion signals indicative of  
478 localization to the extracellular space (Table 1).

479

480 **Vaginal *Porphyromonas* species encode metalloproteases targeting collagens, casein and**  
481 **fibrinogen**

482 To narrow down candidate enzymes responsible for collagenolytic and fibrinogenolytic activities,  
483 inhibitors of the predicted serine, cysteine and metalloproteases (Table 1) were incorporated into  
484 functional assays. Cell-free supernatants from *P. asaccharolytica* and *P. uenonis* were incubated with  
485 type I collagen in the presence of three doses of 1,10-phenanthroline, iodoacetamide or aprotinin to  
486 inhibit metallo-, cysteine and serine proteases, respectively (Figure 3A–D, Supplemental Figure 6A–F).  
487 Treatment of *P. asaccharolytica* supernatants with 1,10-phenanthroline resulted in decreased  
488 collagenase activity, with a statistically significant reduction in max enzyme activity observed with the  
489 highest dose of inhibitor (Figure 3A–B; \* 0.2 mM vs. 0.02 mM  $p=0.004$ ; \*\* 0.2 mM vs. 0.002 mM  
490  $p<0.0001$ , Supplemental Figure 6A). Iodoacetamide treatment revealed a trend toward a dose-  
491 dependent decrease in collagenase activity in individual experiments (Supplemental Figure 7), but this  
492 trend was not observed when multiple experiments were combined (Figure 3A–B, Supplemental Figure  
493 6). However, when *P. asaccharolytica* supernatants were treated with a combination of 1,10-  
494 phenanthroline and iodoacetamide, there was a further reduction in collagenase activity compared to  
495 the 1,10-phenanthroline only treatment (Figure 3A–B, 1,10-Ph 0.2 mM vs. 1,10-Ph + Iodo \*  $p=0.0378$ ,  
496 Supplemental Figure 6). Although aprotinin treatment revealed a trend towards decreased activity in the  
497 time-course, there was no statistically significant decrease in max collagenase activity (Figure 3A–B,  
498 Supplemental Figure 6). For *P. uenonis*, 1,10-phenanthroline also inhibited collagenase activity (Figure  
499 3C–D, Supplemental Figure 6), with a significant reduction in max collagenase activity (Figure 3D; 0.2  
500 mM vs. 0.02 mM  $p=0.002$ ; 0.2 mM vs. 0.002 mM  $p=0.0043$ ). However, treatment with aprotinin or  
501 iodoacetamide did not reduce *P. uenonis* collagenase activity (Figure 3C–D, Supplemental Figure 6)  
502 and the combination treatment of 1,10-phenanthroline and iodoacetamide did not provide an additional  
503 reduction in collagenase activity or max fluorescence (Figure 3C–D) as observed in *P. asaccharolytica*  
504 (Figure 3A-B). Taken together, these results demonstrate that both *P. asaccharolytica* and *P. uenonis*

505 possess secreted metalloproteases that coordinate type I collagen degradation, while *P.*  
506 *asaccharolytica* also appears to secrete a cysteine protease capable of degrading type I collagen.

507 Next, we evaluated whether the same protease classes degrade type IV collagen and casein.  
508 For both *Porphyromonas* species, the metalloprotease inhibitor 1,10-phenanthroline completely  
509 abrogated type IV collagenase activity from supernatants, while serine and cysteine protease inhibitors  
510 did not significantly reduce activity (Figure 3E–H). *P. asaccharolytica* caseinase activity was similar to  
511 its type I collagenase activity (Figure 4A–B) as proteolytic activity was reduced by treatment with 1,10-  
512 phenanthroline, and treatment with both 1,10-phenanthroline and iodoacetamide produced an  
513 additional downward shift in enzyme activity that resulted in a significant reduction in max fluorescence  
514 when compared to the no inhibitor control (Figure 4A, C;  $p=0.0413$ ). In keeping with the type I collagen  
515 and type IV collagen degradation results, *P. uenonis* caseinase activity was significantly decreased by  
516 treatment with the metalloprotease inhibitor 1,10-phenanthroline (Figure 4B,D no inhibitor vs. 1,10-  
517 phenanthroline  $p=0.018$ ), while aprotinin and iodoacetamide treatment did not inhibit activity (Figure  
518 4B,D). Further to this, the 1,10-phenanthroline/iodoacetamide combination did not offer any additional  
519 reduction in protease activity (Figure 4B,D).

520 Inhibitors were also incorporated into fibrinogen degradation assay to determine whether  
521 fibrinogen is proteolyzed by the same enzyme classes as those observed in our collagen and casein  
522 experiments. When *P. asaccharolytica* supernatants were incubated with fibrinogen, complete  
523 degradation of the fibrinogen  $\alpha$  and  $\beta$  chains was observed after 48 hours (Figure 5A, no inhibitor),  
524 while the  $\gamma$  chain remained intact, producing the same degradation profile observed in experiments with  
525 cell suspensions (Figure 2A). Delayed fibrinogen degradation by *P. asaccharolytica* was observed in  
526 the presence of 1,10-phenanthroline, but not with aprotinin or iodoacetamide. This suggests that  
527 secreted metalloproteases from *P. asaccharolytica* contribute to fibrinogen degradation (Figure 5A).  
528 Fibrinogen degradation patterns from *P. uenonis* supernatants differed from the results obtained with  
529 cell suspensions. While the fibrinogen  $\alpha$  chain was degraded after two hours, the  $\beta$  and  $\gamma$  chains  
530 remained intact for the 48-hour time-course (Figure 5B). This finding suggests that *P. uenonis* may  
531 degrade fibrinogen using both secreted and cell surface-associated proteases. Interestingly, the

532 secreted *P. uenonis* protease that contributes to degradation of the fibrinogen  $\alpha$  chain is not impacted  
533 by the inhibitors included in this study (Figure 5B), implying that the secreted fibrinogenolytic enzyme  
534 from *P. uenonis* is distinct from the secreted collagen and casein degrading enzymes.

535 Finally, we sought to further characterize the *Porphyromonas* M13 metalloproteases identified in  
536 our bioinformatics inquiries (Table 1; Figure 6A). Exploration of other *Porphyromonas* species detected  
537 in the urogenital tract and commonly isolated from other human body sites as well, revealed that the  
538 M13 metalloproteases are ubiquitous (Figure 6B). Notably, the M13 metalloprotease in *P. gingivalis* has  
539 been previously characterized as PepO, a secreted endopeptidase involved in host  
540 attachment/invasion and proteolytic activation of endothelin, a potent peptide that induces  
541 vasoconstriction (62, 63, 86). To determine whether the vaginal *Porphyromonas* M13 metalloproteases  
542 can coordinate collagenase and caseinase activity, Poras\_0079 (*pepO*), was cloned and expressed in  
543 myTXTL *in vitro* transcription/translation system. Expression of PepO was confirmed via SDS-PAGE  
544 with the appearance of a 76 kDa protein in PepO reactions, that was absent in the control RNA  
545 polymerase only reactions (Figure 7A). Fluorescent protease assays revealed that PepO is capable of  
546 degrading casein and type I collagen, but not type IV collagen (Figure 7B–D). Further, the  
547 metalloprotease inhibitor, 1,10-phenanthroline, fully abrogated type I collagenase and caseinase  
548 activity of PepO (Figure 7B–C).

549

550

551

552

553

554

555

556

557

## 558 Discussion

559 It is well established that mucinase activity is elevated during BV (87-90), and these activities  
560 have been attributed to *Gardnerella* (89, 91) and *Prevotella* species (89, 92, 93). In support of this,  
561 sialidase activity has been utilized as a diagnostic marker for BV (92, 94-97). Although most studies  
562 have focused on degradation of mucin glycans, proteolytic activity in vaginal fluid has also been linked  
563 with BV status (56-58) and described among predominant BV-associated bacteria (59, 60). Isolates of  
564 *Prevotella bivia* from women with preterm premature rupture of membranes (PPROM) were shown to  
565 secrete proteases that degrade elastin, collagen, casein and gelatin (59). In another study screening  
566 bacterial strains from women with PPRM, preterm labour or puerperal infection, protease activity was  
567 confirmed in phylogenetically diverse Gram-negative and Gram-positive organisms. This included the  
568 BV-associated bacteria *Gardnerella vaginalis*, *Prevotella bivia* (formerly *Bacteroides bivius*) and *P.*  
569 *asaccharolytica* (formerly *Bacteroides asaccharolyticus*) (60). The authors found that *P. bivia* and *P.*  
570 *asaccharolytica* exhibited collagen and casein degradation, while *G. vaginalis* exclusively degraded  
571 casein. Our findings confirm the casein/collagen degradation capacity of *P. asaccharolytica* and extend  
572 these functional activities to *P. uenonis*. Furthermore, we demonstrate that both vaginal  
573 *Porphyromonas* species also degrade type IV collagen, commonly found in reproductive tissues (98,  
574 99), and provide the first description of the diverse protease types capable of coordinating these  
575 activities. To understand whether proteolytic activity is also observed among commensal bacteria that  
576 inhabit the vaginal niche, we investigated proteolytic activity of *Lactobacillus crispatus*, demonstrating  
577 that *L. crispatus* is not capable of degrading type I collagen or casein. The absence of detectable  
578 proteolytic activity from a commensal *Lactobacillus* strain and the growing evidence for secreted  
579 proteolytic activity from BV-associated bacteria (59, 60), including vaginal *Porphyromonas* species,  
580 suggests that degradation of host proteins could be an important virulence trait of opportunistic  
581 pathogens in the female genital tract.

582 Our results demonstrate that vaginal *Porphyromonas* species are capable of directly degrading  
583 fibrinogen and impairing fibrin clot formation. Fibrinogen is detected in vaginal lavage fluid (100, 101) and  
584 is targeted by other reproductive pathogens (102, 103). Although the implications of altered fibrinogen

585 levels in the female reproductive tract are not clear, impaired clotting functions could have severe  
586 consequences during labour and postpartum. Fibrinogen is known to increase substantially during  
587 pregnancy (104, 105), and decreased plasma fibrinogen levels have been associated with increased  
588 severity of postpartum haemorrhage (106). Further to this, genetic fibrinogen abnormalities are  
589 significantly associated with miscarriage, placental abruption and postpartum hemorrhage (107-110).

590 Within the female genital tract, collagens are found within the vagina, cervix, uterus and pelvic  
591 floor and their composition and content is significantly altered throughout pregnancy and during labour  
592 (111). Vaginal and cervical tissue is primarily composed of fibrillar type I and III collagens, with type I  
593 collagen playing a critical role in tissue integrity (112-114). Type IV collagen is typically found within  
594 basement membranes and is enriched within the placenta (98). Both type I and type IV collagens are  
595 found within chorioamniotic membranes at the maternal-fetal interface (99). During pregnancy, cervical  
596 collagens (type I, III) undergo a shift toward increased solubility and decreased abundance, contributing  
597 to cervical softening (115-117), while increased collagenase activity is observed during cervical ripening  
598 to prepare for dilation and parturition (118, 119). Importantly, cervical remodelling during term and  
599 preterm labour occurs via the same mechanisms with host matrix metalloproteinases (MMPs)  
600 coordinating cervical collagen degradation (120). Premature preterm rupture of the membrane  
601 (PPROM) has been associated with infection (121, 122), increased host MMP collagenase activity  
602 (123, 124) and decreased collagen content (125). Furthermore, microbial collagenases can reduce the  
603 tensile strength of chorioamniotic membranes *ex vivo* (126), and collagenase activity has been  
604 detected in clinical isolates from PPRM patients (59, 60). Taken together, these findings imply that  
605 host and microbial modulation of collagen within the cervix and chorioamniotic membranes could play  
606 critical roles in preterm labour and PPRM. In the present study, our findings indicate that *P.*  
607 *asaccharolytica* and *P. uenonis* secreted proteases are capable of degrading both type I and type IV  
608 collagens, uncovering a possible mechanism for how these microbes contribute to the initiation of  
609 preterm labour.

610 *P. asaccharolytica* and *P. uenonis* are phylogenetically related to *P. gingivalis*, an opportunistic  
611 pathogen that drives periodontal disease (30), disseminates through the bloodstream (35) and

612 contributes to adverse pregnancy outcomes (34, 127). Many of these outcomes are driven by the *P.*  
613 *gingivalis* gingipains, cysteine proteases that degrade host extracellular matrix components and  
614 immune factors (41). Our investigations demonstrate that *P. asaccharolytica* and *P. uenonis* possess  
615 gingipain-like activities, including degradation of type I and type IV collagen, casein and fibrinogen.  
616 However, key differences in total enzyme activity were observed. *P. gingivalis* supernatants possessed  
617 higher total collagenase and caseinase enzyme activity than the vaginal *Porphyromonas* species based  
618 on the maximum RFU, time to max RFU and area under the curve values. Previous comparative  
619 genomic analyses of *Porphyromonas* species included two *P. asaccharolytica* genomes (DSM 20707,  
620 PR426713P-I) and one *P. uenonis* genome (60-3), and used a reciprocal BLAST (BLASTall) to confirm  
621 that *P. asaccharolytica* and *P. uenonis* do not encode gingipain orthologs (78). Expanding on these  
622 findings, our study used both BLAST and domain (Pfam) queries, and included all available *P.*  
623 *asaccharolytica* and *P. uenonis* genomes including two additional *P. uenonis* genomes (DSM 23387;  
624 IMG Genome IDs 2528311143 and 2585427891) that were not included in the previous study. In  
625 agreement with the previous study (78), our findings did not return any gingipain ortholog hits from  
626 reciprocal BLASTP or Pfam searches. This absence of gingipain orthologs is in keeping with the  
627 observed differences in functional proteolytic activity. Taken together, these results prompted an  
628 investigation of novel candidate proteases.

629 Our bioinformatics inquiries identified five candidate secreted collagenases in each vaginal  
630 *Porphyromonas* species. By incorporating protease inhibitors into our functional assays, we determined  
631 that *Porphyromonas* secreted metalloproteases degrade collagens (type I, IV), casein and fibrinogen.  
632 For *P. uenonis*, we observed consistent results with metalloprotease inhibitor 1,10-phenanthroline  
633 exclusively inhibiting degradation with casein and collagens (type I,IV), while no inhibitors blocked  
634 fibrinogen degradation. Importantly, no additional reduction in activity was observed when the cysteine  
635 protease inhibitor iodoacetamide was included with 1,10-phenanthroline in type I collagenase or  
636 caseinase assays, suggesting that secreted metalloproteases are solely responsible for degradation of  
637 these substrates by *P. uenonis*. With *P. asaccharolytica*, on the other hand, we observed that  
638 iodoacetamide caused a dose-dependent reduction in *P. asaccharolytica* type I collagenase activity.



639 Furthermore, when 1,10-phenanthroline and iodoacetamide were combined, there was an additional  
640 decrease in *P. asaccharolytica* type I collagenase and caseinase activity relative to treatment with 1,10-  
641 phenanthroline alone. These results suggest that although *P. asaccharolytica* and *P. uenonis* possess  
642 the same candidate collagenases, only *P. asaccharolytica* appears to secrete both metallo and cysteine  
643 proteases in the experimental conditions used in our study. This is further supported by collagen  
644 zymogram results, where banding patterns revealed different sizes of collagenases from *P.*  
645 *asaccharolytica* and *P. uenonis*. Future investigations will need to address whether pH or redox state  
646 may affect the activity of the cysteine proteases. Additionally, due to the general proteolytic activity of  
647 the metallo and cysteine proteases, it is plausible that secreted proteases may degrade other proteins  
648 in the supernatants, including other proteases.

649 Our bioinformatics approach highlighted the U32 collagenases as likely candidates to confer  
650 proteolytic activity, however, we were unable to find any sequence-based evidence for secretion to the  
651 extracellular space or localization to the cell surface in *P. asaccharolytica* or *P. uenonis*. As such, these  
652 enzymes are unlikely to be found in culture supernatants. The collagenase activity of the *P. gingivalis*  
653 U32 collagenase, PrtC, has been confirmed (84, 85, 128), but these studies used cell lysates (85),  
654 recombinant PrtC (84) or heterologous expression systems (128). To our knowledge, no studies have  
655 determined the subcellular localization of PrtC, and sequence analysis does not reveal any indication of  
656 secretion signals. In fact, additional studies have confirmed that the majority of collagenase activity  
657 from *P. gingivalis* is attributed to the gingipains (129, 130). On the other hand, characterized U32  
658 collagenases from other bacteria are known to be secreted (131, 132). The active site residues,  
659 protease type and inhibitors of U32 collagenase remain unknown, but the lack of evidence for secretion  
660 in *Porphyromonas* species makes these U32 collagenases improbable candidates for the proteolytic  
661 activity observed in this study.

662 Since 1,10-phenanthroline inhibited the secreted proteolytic activity of *P. asaccharolytica* and *P.*  
663 *uenonis*, the M13 metalloproteases were expected to confer the observed protease activity. These  
664 predicted collagenases from *P. asaccharolytica* and *P. uenonis* each contain an N-terminal signal  
665 sequence, M13 peptidase domain and a catalytic collagenase domain. The *P. asaccharolytica* M13

666 metalloprotease was cloned and expressed in an *in vitro* transcription/translation system and confirmed  
667 to contribute type I collagenase and caseinase activity. Phylogenetic analysis of the *P. asaccharolytica*  
668 and *P. uenonis* M13 metalloproteases revealed an orthologous relationship with the *P. gingivalis*  
669 endopeptidase, PepO (PgPepO), and confirmed the presence of PepO orthologs in other vaginal and  
670 oral *Porphyromonas* species. Previous work characterizing *P. gingivalis* PepO revealed sequence  
671 conservation with the human endothelin converting enzyme 1 (ECE-1), which proteolytically processes  
672 inactive endothelin (big endothelin) into active endothelin. Activated endothelin peptides can induce  
673 vasoconstriction and cellular proliferation, alter vascular permeability and activate inflammatory cells  
674 (133, 134). PgPepO was confirmed to possess ECE-1 like activity, converting all three subtypes of big  
675 endothelin to active endothelin (62). Numerous studies have also demonstrated that PgPepO plays a  
676 role in cellular invasion and intracellular survival of *P. gingivalis* (63, 86). However additional substrates  
677 for this endopeptidase and the functional consequences of bacterial endothelin activation have yet to  
678 be explored.

679         PepO orthologs have also been characterized in select *Lactobacillus* species: *Lactobacillus*  
680 *lactis* and *Lactobacillus rhamnosus* PepO can proteolyze casein, but these enzymes are either  
681 confirmed or predicted to localize in the cytoplasm (135, 136). PepO has also been explored in  
682 *Streptococcus* species, including *Streptococcus pneumoniae* and *Streptococcus pyogenes* (Group A  
683 Streptococci; GAS). In *S. pneumoniae*, PepO is detected on the bacterial cell surface and in culture  
684 supernatants. *S. pneumoniae* PepO binds to host cells and fibronectin, facilitating bacterial adhesion  
685 and invasion (137). Streptococcal PepO also interacts with the host immune system, but there is  
686 conflicting evidence on whether this contributes to immune evasion or activation. While some studies  
687 demonstrate that *S. pneumoniae* PepO binds plasminogen and complement proteins (C1q),  
688 contributing to escape from fibrin clots and complement attack (137, 138), others demonstrate that  
689 PepO enhances macrophage autophagy and bactericidal activity via TL2/4 activation (139, 140).  
690 Surprisingly, none of these studies have shown any proteolytic activity of *S. pneumoniae* PepO. In  
691 GAS, PepO has been detected both in the cytoplasm and as a secreted protein (141, 142). Similar to *S.*  
692 *pneumoniae*, GAS PepO contributes to complement evasion via C1q binding (142). GAS PepO

693 participates in regulating quorum sensing via direct degradation of peptide pheromones secreted by  
694 GAS (141). Taken together, this body of work highlights the broad substrate specificity and diverse  
695 functionality of bacterial PepO. To our knowledge, our work characterizing *P. asaccharolytica* PepO is  
696 the first to demonstrate degradation of host extracellular matrix (type I collagen), adding another  
697 substrate to the proteolytic repertoire of PepO. The findings that PepO can degrade regulatory proteins  
698 secreted by host cells (*P. gingivalis* PepO: endothelin) and bacterial cells (GAS PepO: quorum sensing  
699 peptides) suggests that PepO enzymes could play a role in the dysregulation of proteolytic cascades.  
700 Further investigation is needed to better understand the substrates targeted by PepO proteins in  
701 complex mucosal body sites such as the female reproductive tract to reveal how this enzyme  
702 contributes to the pathogenesis of phylogenetically diverse bacteria.

703

704

705

706

707

708

709

710

711

712

713

714

715

716

717

718

719 **Acknowledgements**

720 The authors would like to thank Dr. Antoine Dufour and Dr. Morley Hollenberg for technical assistance  
721 and advice on this work.

722

723 **Conflict of Interest**

724 The authors declare that the research was conducted in the absence of any commercial or financial  
725 relationships that could be construed as a potential conflict of interest.

726

727 **Funding**

728 This work was supported by the Canadian Institutes of Health Research (L.K.S., FRN 161348), the  
729 National Institutes of Health (L.K.S., STI-CRC Developmental Research Program Award associated  
730 with U19AI113173), the Canadian Foundation for Innovation John R. Evans Leaders Fund (L.K.S,  
731 36603), Alberta Innovates (K.V.L. and A.D.), the Government of Alberta, and the University of Calgary's  
732 Snyder Institute for Chronic and Infectious Diseases, International Microbiome Centre, O'Brien Centre  
733 for the Bachelor of Health Sciences (V.C.H.B.), and Program for Undergraduate Research Experience  
734 (E.K.).

735

736

737

738

739

740

741

742

743

744

745 **Figures**

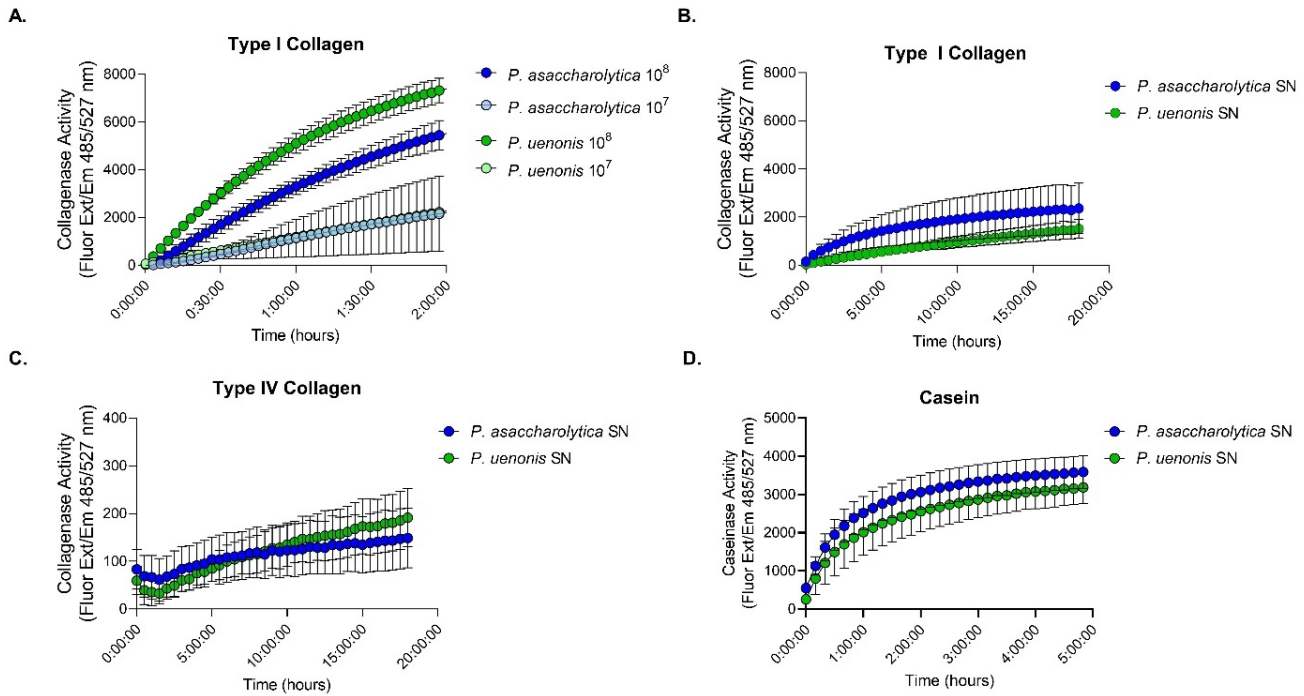

746

747 **Figure 1. Proteolytic activity of vaginal *Porphyromonas* species. (A) Cell suspensions of *P.***

748 *asaccharolytica* and *P. uenonis* at  $10^7$  or  $10^8$  cfu/reaction were incubated with fluorophore-conjugated

749 type I collagen. Results are presented as mean  $\pm$  standard error from three independent experiments

750 performed in technical triplicate or quadruplicate. Collagen degradation was measured every three

751 minutes by detecting the increase in fluorescence (Excitation 485 nm/Emission 527 nm) over a two-

752 hour time course. (B–C) Cell-free supernatants of *P. asaccharolytica* and *P. uenonis* were incubated

753 with fluorophore-conjugated (B) type I or (C) type IV collagen over an 18-hour time course;

754 fluorescence was measured every 30 minutes. Results are presented as mean  $\pm$  standard error from

755 seven independent experiments (type I collagen) and four independent experiments (type IV collagen)

756 performed in technical triplicate. (D) Cell-free supernatants of *P. asaccharolytica* and *P. uenonis* were

757 incubated with fluorophore-conjugated casein over a five-hour time course; fluorescence was measured

758 every ten minutes. Results are presented as mean  $\pm$  standard error from five independent experiments

759 performed in technical triplicate.

760

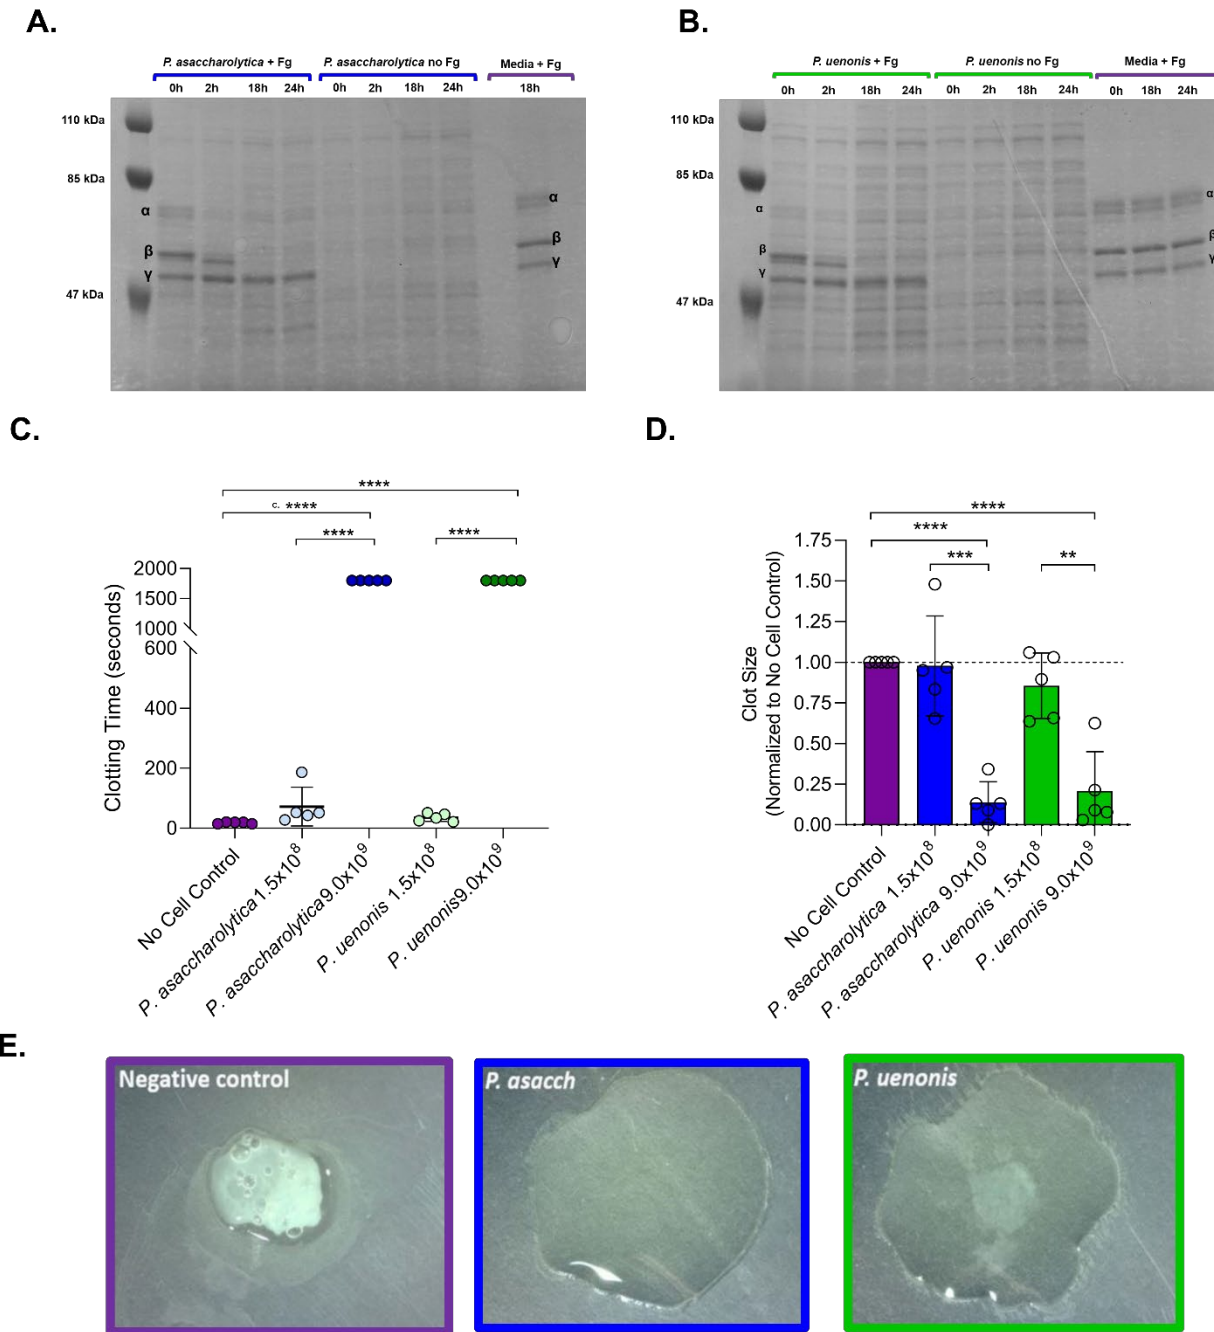

761

762 **Figure 2. Vaginal *Porphyromonas* species degrade fibrinogen and impair clot formation. (A–B)**

763 SDS-PAGE of (A) *P. asaccharolytica* and (B) *P. uenonis* cell suspensions incubated with human

764 fibrinogen (+Fg), saline (no Fg), or a cell-free media control (sBHI media +Fg). Samples collected over

765 24 hours were assessed for fibrinogen degradation, indicated by absence of bands corresponding to  $\alpha$ ,

766  $\beta$ , and  $\gamma$  fibrinogen chains in '*Porphyromonas* cells + Fg' treatments compared to 'no Fg' or media

767 controls. (C) Time from thrombin addition to fibrin clot formation. Citrated plasma was pre-incubated

768 with cell suspensions of *P. asaccharolytica* or *P. uenonis* or no cell controls. Experiments were

769 performed in technical duplicate and results are presented as mean  $\pm$  standard error from five  
770 independent experiments. **(D)** Quantitative evaluation of clot size at the experimental endpoint (>30  
771 minutes). Following clotting time assessment, samples were subjected to well area scans at  
772 absorbance 405 nm to indicate the average clot size. Experiments were performed in technical  
773 duplicate and control reactions without thrombin were used to blank the experimental reactions. Data  
774 were normalized to the average clot size of the no cell control within each experiment. Results are  
775 presented as mean  $\pm$  standard error from five independent experiments. For clotting time, significance  
776 was assessed by one-way ANOVA with Holm-Sidak's multiple comparisons test where \*\*\*\*  $p < 0.0001$ .  
777 For endpoint clot size evaluation, significance was assessed by one-way ANOVA with Holm-Sidak's  
778 multiple comparisons test where \*\*\*\*  $p < 0.0001$ , \*\*\*  $p < 0.0003$ , \*\*  $p = 0.003$  **(E)** Endpoint qualitative  
779 evaluation of fibrin clots (>30 minutes) after clotting time assay with cell suspensions of *P.*  
780 *asaccharolytica* ( $2.4 \times 10^9$  cfu/reaction), *P. uenonis* ( $3.0 \times 10^9$  cfu/reaction) or no cell control.

781

782

783

784

785

786

787

788

789

A.

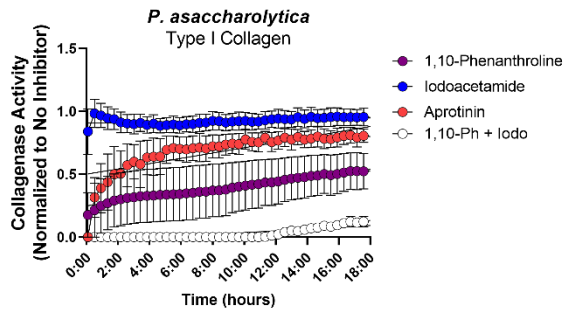

B.

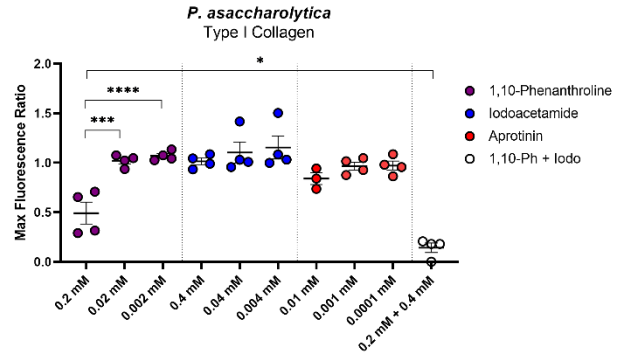

C.

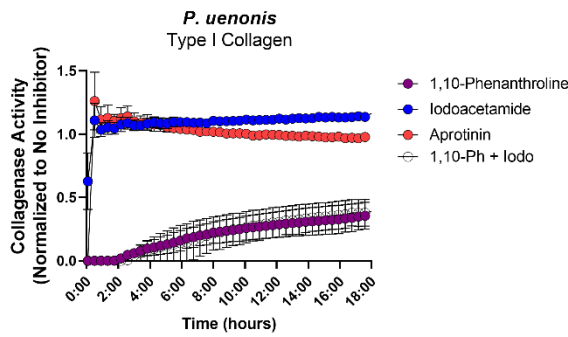

D.

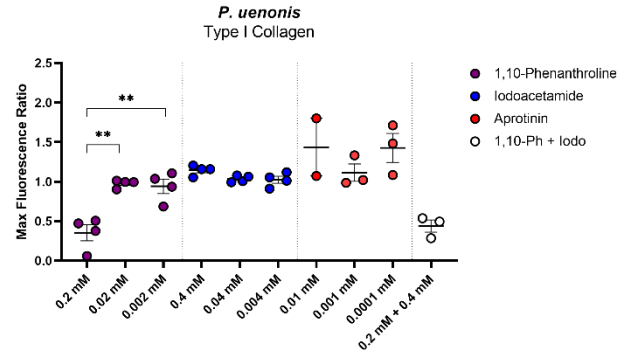

E.

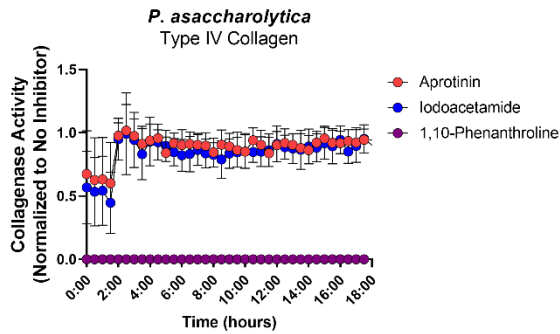

F.

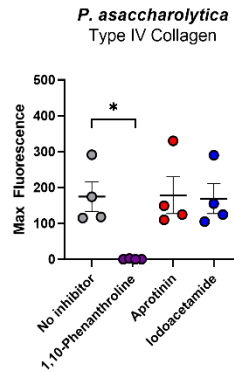

G.

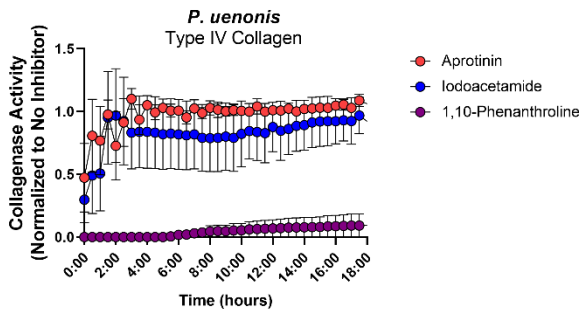

H.

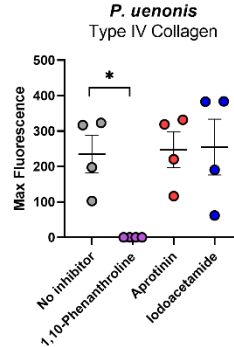



791 **Figure 3. Vaginal *Porphyromonas* protease types displaying type I and type IV collagenase**  
792 **activity.** Cell-free supernatants of **(A-B, E-F)** *P. asaccharolytica* and **(C-D, G-H)** *P. uenonis* were  
793 incubated with fluorophore-conjugated **(A-D)** type I collagen or **(E-H)** type IV collagen in the presence  
794 of the metalloprotease inhibitor 1,10-phenanthroline, the cysteine protease inhibitor, iodoacetamide, or  
795 the serine protease inhibitor, aprotinin. **(A,C)** Type I collagen degradation was measured every 30  
796 minutes by detecting fluorescence (Excitation 485 nm/Emission 527 nm) over an 18-hour time course in  
797 the presence of 0.2 mM 1,10-phenanthroline, 0.4 mM iodoacetamide, 0.01 mM aprotinin or 0.2 mM  
798 1,10-phenanthroline + 0.4 mM iodoacetamide. Results are presented as a ratio normalized to the no  
799 inhibitor control (set to 1.0). **(B)** Maximum fluorescence of *P. asaccharolytica* collagenase activity,  
800 expressed as a ratio normalized to the no inhibitor control, in the presence of three doses of the  
801 inhibitors. Results are presented as mean  $\pm$  standard error from four independent experiments or three  
802 independent experiments (*P. asaccharolytica* + aprotinin 0.01 mM) performed in technical triplicate.  
803 Statistical significance was assessed with a one-way ANOVA and Tukey's post-hoc comparison where  
804 1,10-phenanthroline 0.2 mM vs. 0.02 mM \*\*\*\*  $p < 0.0001$ , 1,10-phenanthroline 0.2 mM vs. 0.002 mM \*\*\*  
805  $p = 0.0004$  and 1,10-phenanthroline 0.2 mM vs. 0.2 mM 1,10-phenanthroline + 0.4 mM iodoacetamide \*  
806  $p = 0.0387$ . **(D)** Maximum fluorescence ratios of *P. uenonis* collagenase activity, expressed as a ratio  
807 normalized to the no inhibitor control, in the presence of three doses of the inhibitors. Results are  
808 presented as mean  $\pm$  standard error from four independent experiments or two independent  
809 experiments (*P. uenonis* + aprotinin 0.01 mM) performed in technical triplicate. Statistical significance  
810 was assessed with a one-way ANOVA and Tukey's post-hoc comparison, where 1,10-phenanthroline  
811 0.2 mM vs. 0.02 mM \*\*  $p = 0.002$ , 1,10-phenanthroline 0.2 mM vs. 0.002 mM \*\*  $p = 0.0043$ . **(E-H)** Type IV  
812 collagen degradation was measured every 30 minutes by detecting fluorescence (Excitation 485  
813 nm/Emission 527 nm) over an 18-hour time course in the presence of 0.2 mM 1,10-phenanthroline, 0.4  
814 mM iodoacetamide, 0.01 mM aprotinin or 0.2 mM 1,10-phenanthroline + 0.4 mM iodoacetamide.  
815 Results are presented as a ratio normalized to the no inhibitor control and presented as mean  $\pm$   
816 standard error from three independent experiments performed in technical triplicate. **(F)** Maximum  
817 fluorescence of *P. asaccharolytica* supernatant collagenase activity in the presence of inhibitors.

818 Results are presented as mean  $\pm$  standard error from four independent experiments performed in  
819 technical triplicate. Statistical significance was assessed with a one-way ANOVA and Tukey's post-hoc  
820 comparison where 1,10-phenanthroline 0.2 mM vs. no inhibitor \*  $p=0.0352$ . **(H)** Maximum fluorescence  
821 of *P. uenonis* supernatant collagenase activity in the presence of inhibitors. Results are presented as  
822 mean  $\pm$  standard error from four independent experiments performed in technical triplicate. Statistical  
823 significance was assessed with a one-way ANOVA and Tukey's post-hoc comparison where 1,10-  
824 phenanthroline 0.2 mM vs. no inhibitor \*  $p=0.0398$ .

825

826

827

828

829

830

831

832

833

834

835

836

837

838

839

840

841

842

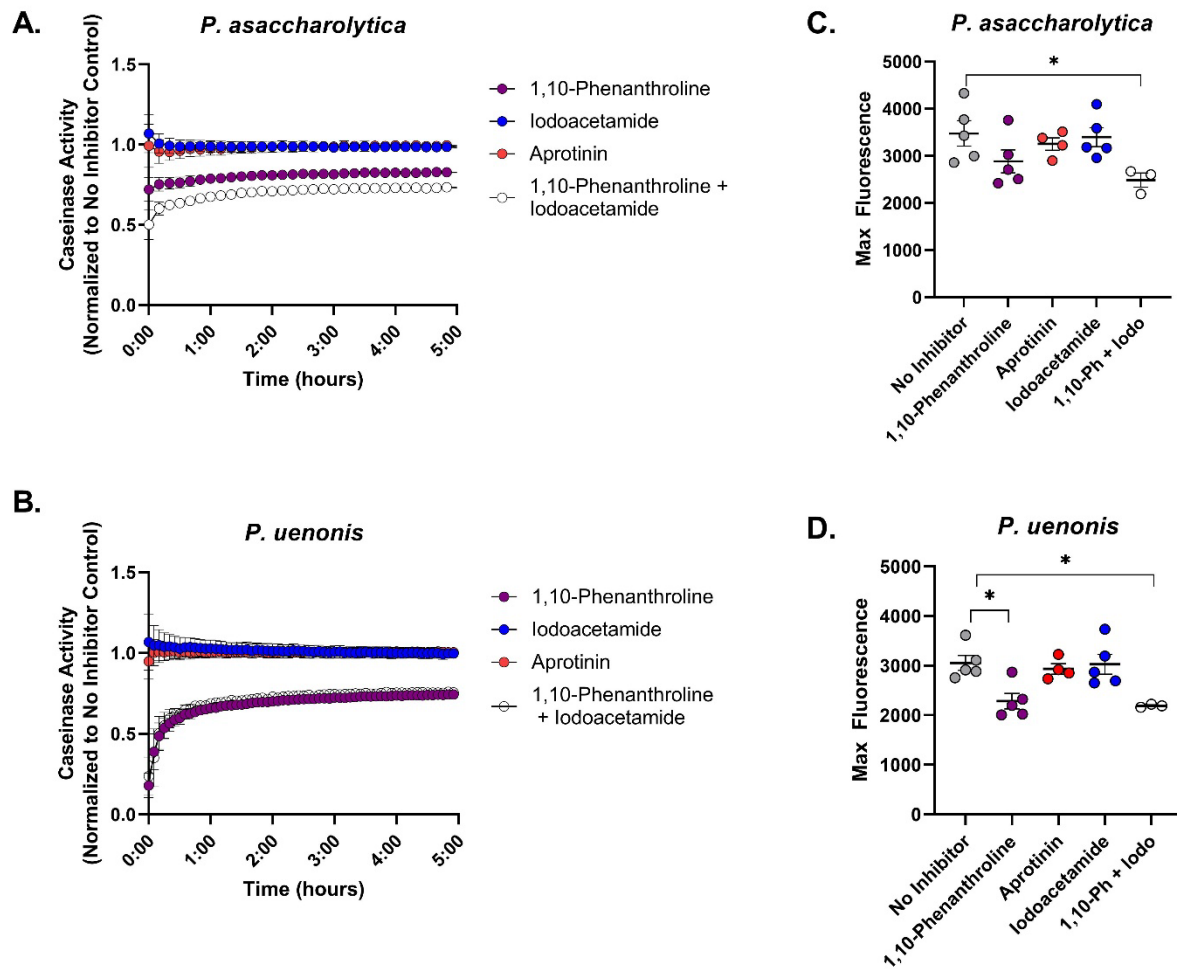

843

844 **Figure 4. *P. asaccharolytica* and *P. uenonis* secreted metalloproteases have broad substrate**

845 **specificity. (A-B)** Cell-free supernatants of **(A)** *P. asaccharolytica* and **(B)** *P. uenonis* were incubated

846 with fluorophore-conjugated casein in the presence of the metalloprotease inhibitor 1,10-phenanthroline

847 (0.2 mM), the cysteine protease inhibitor iodoacetamide (0.4 mM), or the serine protease inhibitor

848 aprotinin (0.01 mM). Casein degradation was measured every 10 minutes by detecting the increase in

849 fluorescence (Excitation 485 nm/Emission 527 nm) over a 5-hour time course. Results are presented

850 as a ratio normalized to the no inhibitor control and presented as mean  $\pm$  standard error from five

851 independent experiments performed in technical triplicate. **(C)** Maximum fluorescence of *P.*

852 *asaccharolytica* supernatant caseinase activity in the presence of inhibitors. Results are presented as

853 mean  $\pm$  standard error from five independent experiments performed in technical triplicate. Statistical

854 significance was assessed with a one-way ANOVA and Tukey's post-hoc comparison, where inhibitor

855 combination vs. no inhibitor \*  $p=0.0413$ . **(D)** Maximum fluorescence of *P. uenonis* supernatant

856 caseinase activity in the presence of inhibitors. Results are presented as mean  $\pm$  standard error from  
857 five independent experiments performed in technical triplicate. Statistical significance was assessed  
858 with a one-way ANOVA and Tukey's post-hoc comparison, where 1,10-phenanthroline 0.2 mM vs. no  
859 inhibitor p=0.0145, inhibitor combination vs. no inhibitor p=0.0180.

860

861

862

863

864

865

866

867

868

869

870

871

872

873

874

875

876

877

878

879

880

881

882

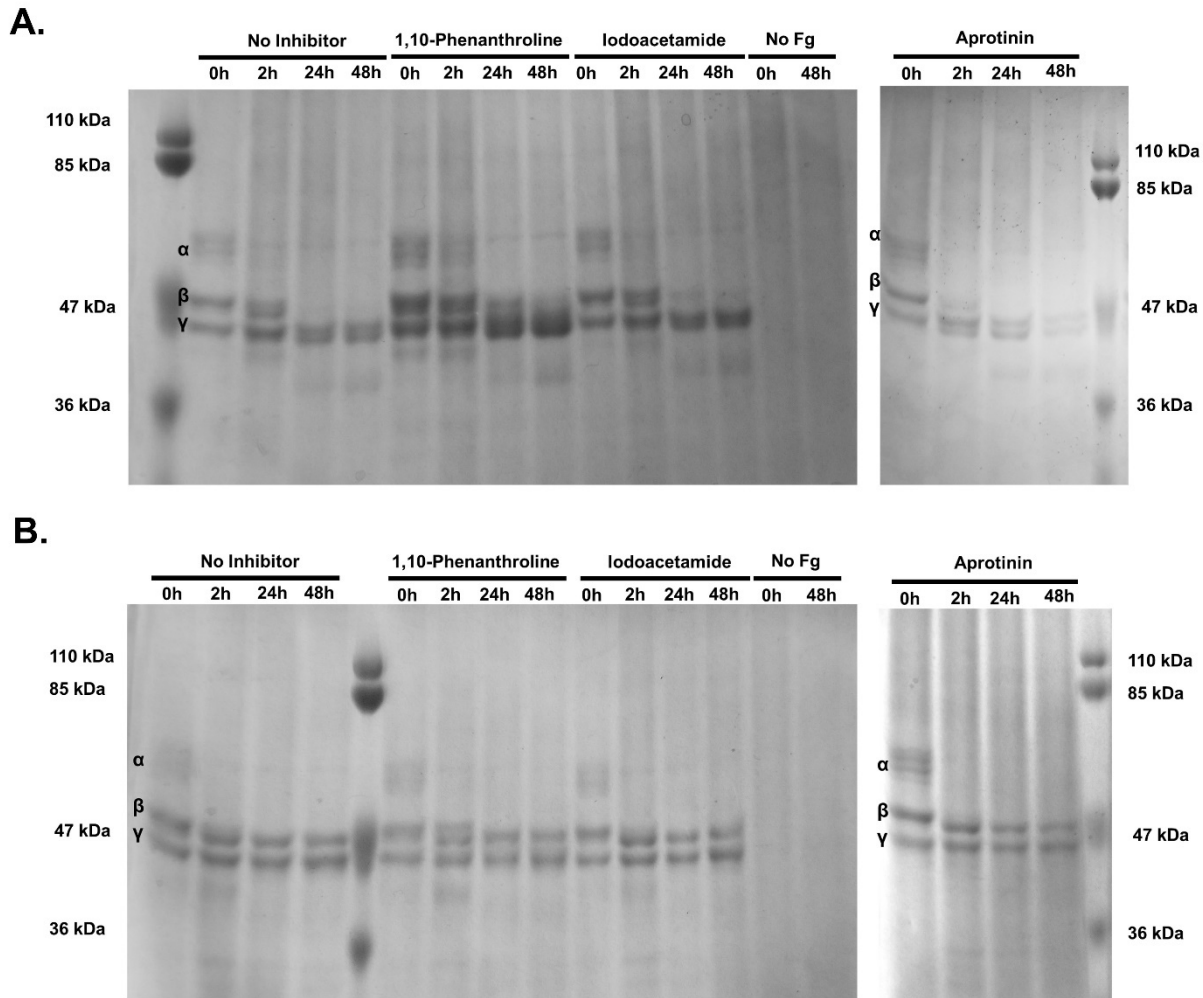

883

884 **Figure 5. *P. asaccharolytica* metalloproteases degrade fibrinogen. (A)** SDS-PAGE of *P.*

885 *asaccharolytica* supernatants incubated with human fibrinogen in the presence of 1,10-phenanthroline

886 (0.5 mM), iodoacetamide (1mM) or aprotinin (0.01 mM) compared to no inhibitor and no fibrinogen

887 controls. Samples collected over 48 hours were assessed for fibrinogen degradation, indicated by

888 absence of bands corresponding to  $\alpha$ ,  $\beta$ , and  $\gamma$  fibrinogen chains as denoted within gel images. **(B)**

889 SDS-PAGE of *P. uenonis* supernatants incubated with human fibrinogen in the presence of 1,10-

890 phenanthroline (0.5 mM), iodoacetamide (1mM) or aprotinin (0.01 mM) compared to no inhibitor and no

891 fibrinogen controls. Samples collected over 48 hours were assessed for fibrinogen degradation,

892 indicated by absence of bands corresponding to  $\alpha$ ,  $\beta$ , and  $\gamma$  fibrinogen chains.

893

894

A.

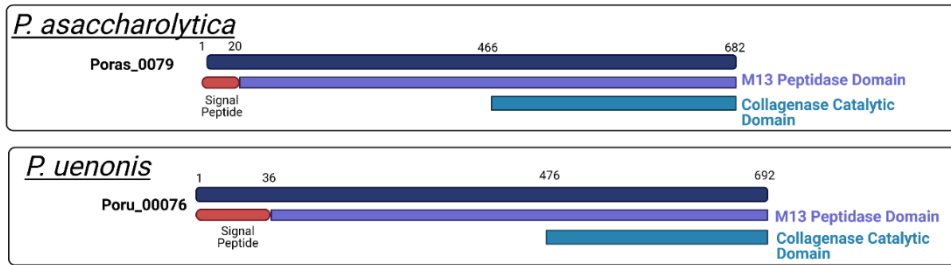

B.

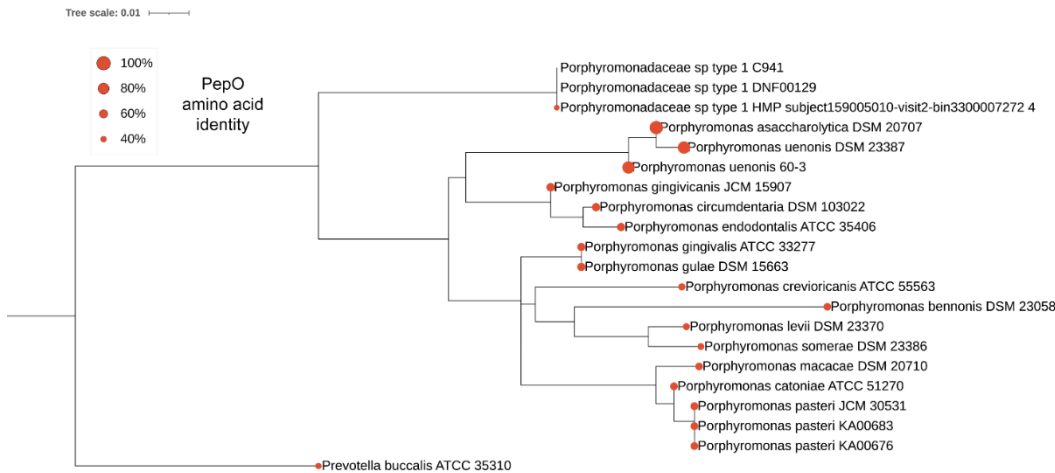

895

896 **Figure 6.** Secreted PepO metallopeptidases identified in *P. asaccharolytica* and *P. uenonis*. (A)

897 Domain structure of candidate host-degrading PepO metalloproteases from *P. asaccharolytica* and *P.*

898 *uenonis*. (B) 16S rRNA gene phylogeny of *Porphyromonas* species identified in the urogenital tract.

899 The Maximum Likelihood tree was created using RAxML and rooted to *Prevotella buccalis* (same order,

900 different family). Red circles on each leaf indicate the percent amino acid identity of that species' PepO

901 ortholog compared to *P. asaccharolytica* PepO (Poras\_0079 = 100%). The taxon previously identified

902 as uncultivated *Porphyromonas* species type 1 was found to encompass two cultured, but

903 unsequenced isolates (DNF00129 and C941, >99% 16S rRNA gene identity over 1120 nt). We also

904 identified a metagenome assembled genome (MAG) in IMG/MER that encoded a 958 bp 16S rRNA

905 gene fragment >99.5% identical to those from the cultured isolates DNF00129 and C941. Since this

906 MAG represents the only genome sequence available for this species, we used it in our PepO queries,

907 identifying an orthologue 42% identical to *P. asaccharolytica* PepO. Since this taxon's PepO ortholog

908 was more distantly related to *P. asaccharolytica* PepO than the PepO ortholog identified in *Prevotella*

909 *buccalis* (47% identical), it may represent a novel genus or family; we therefore chose to label this  
910 taxon *Porphyromonadaceae* sp. type 1. Our phylogenetic analysis, along with inquiries through the  
911 Genome Taxonomy Database, furthermore indicated that vaginal isolates KA00683 and KA00676  
912 should be designated as belonging to the species *P. pasteri*, with each containing a PepO ortholog 58–  
913 59% identical to that from *P. asaccharolytica*.

914

915

916

917

918

919

920

921

922

923

924

925

926

927

928

929

930

931

932

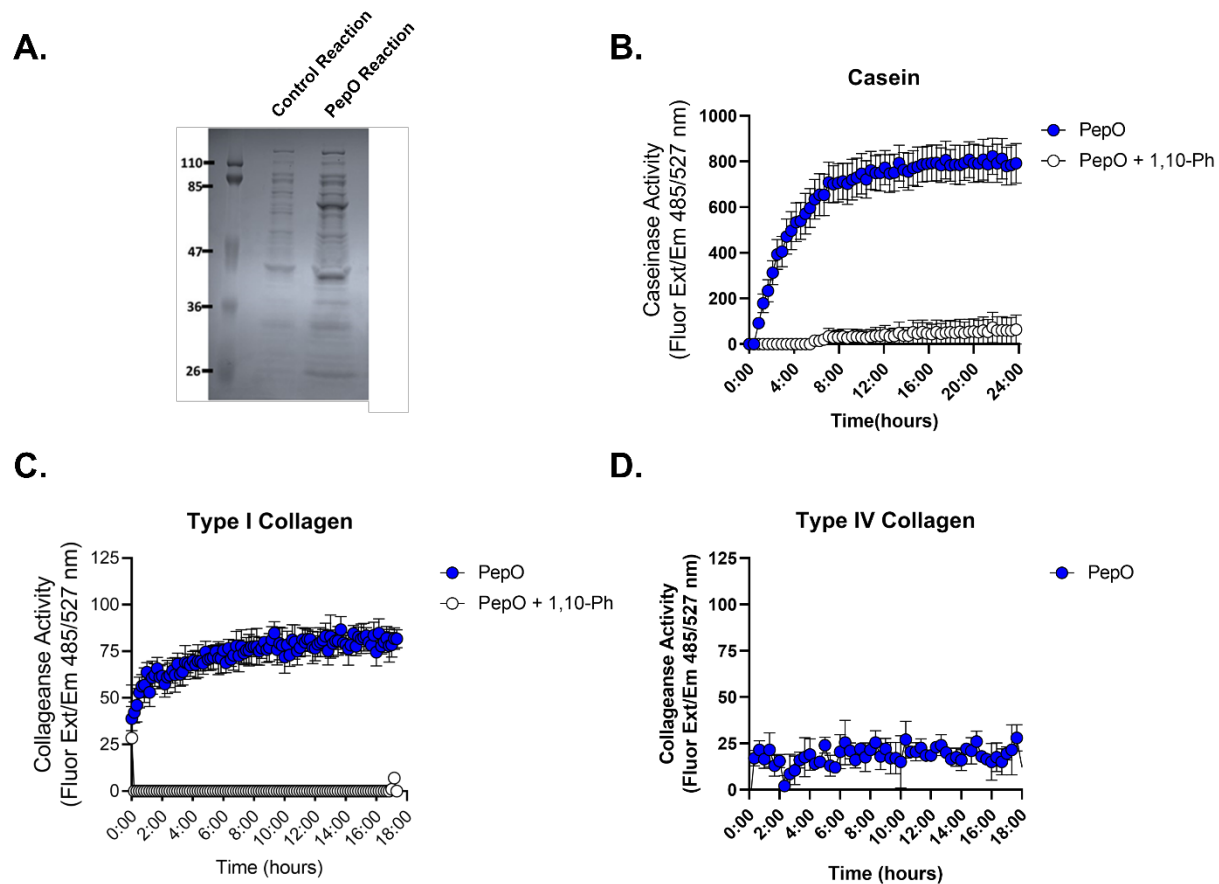

933

934 **Figure 7.** The *P. asaccharolytica* metalloprotease PepO degrades casein and type I collagen (A) SDS-  
935 PAGE of control *in vitro* transcription/translation (TXTL) reaction (RNA polymerase only) and PepO  
936 TXTL reaction. (B-D) PepO TXTL reactions were incubated with (B) FITC-casein or (C) fluorophore-  
937 conjugated type I collagen in the presence of 0.5 mM 1,10-phenanthroline. Casein degradation was  
938 measured every 30 minutes by detecting the increase in fluorescence (Excitation 485 nm/Emission 527  
939 nm) over a 24-hour time course and results are presented as mean  $\pm$  standard error from three  
940 independent experiments. Collagen degradation was measured every 10 minutes by detecting the  
941 increase in fluorescence (Excitation 485 nm/Emission 527 nm) over an 18-hour time course. Results  
942 are presented as mean  $\pm$  standard error from five independent experiments. (D) PepO TXTL reactions  
943 were incubated with type IV collagen over an 18-hour time course and results are presented as mean  $\pm$   
944 standard deviation from one independent experiment.



## Tables

**Table 1. Candidate collagenases in *P. asaccharolytica* and *P. uenonis*.**

| Protease Type                                    | <i>P. asaccharolytica</i> DSM 20707 |                                                                    |                                                    |                       | <i>P. uenonis</i> DSM 23387 |                                     |                                                    |                       | Interstrain Identity* |
|--------------------------------------------------|-------------------------------------|--------------------------------------------------------------------|----------------------------------------------------|-----------------------|-----------------------------|-------------------------------------|----------------------------------------------------|-----------------------|-----------------------|
|                                                  | Gene                                | Collagenase IDs <sup>⊖</sup>                                       | Secretion                                          | Intrastrain Identity* | Gene                        | Collagenase IDs <sup>⊖</sup>        | Secretion                                          | Intrastrain Identity* |                       |
| <b>Ig-containing Serine Protease<sup>⊖</sup></b> | Poras_1474                          | IPR013783<br>IPR026444<br>TIGR04183                                | Type IX <sup>#</sup> ,<br>Sec/SPI <sup>&amp;</sup> | 45.1%                 | Poru_01109                  | IPR013783<br>IPR026444<br>TIGR04183 | Type IX <sup>#</sup> ,<br>Sec/SPI <sup>&amp;</sup> | 35.2%                 | 77.5%                 |
|                                                  | Poras_0168                          | IPR013783<br>IPR026444<br>TIGR04183                                | Type IX <sup>#</sup>                               |                       | Poru_00939                  | IPR13783<br>IPR026444<br>TIGR0483   | Type IX <sup>#</sup> ,<br>Sec/SPI <sup>&amp;</sup> |                       | 100%                  |
| <b>M13 Metalloprotease<sup>§</sup></b>           | Poras_0079                          | IPR024079                                                          | Sec/SPI <sup>&amp;</sup>                           | N/A                   | Poru_00076                  | IPR024079                           | Sec/SPI <sup>&amp;</sup>                           | N/A                   | 92.7%                 |
| <b>C10 Protease<sup>@</sup></b>                  | Poras_1659                          | IPR026444                                                          | Type IX <sup>#</sup> ,<br>Sec/SPI <sup>&amp;</sup> | 31.3%                 | Poru_01083                  | IPR026444<br>TIGR0483               | Type IX <sup>#</sup>                               | 28.8%                 | 67.2%                 |
|                                                  | Poras_0891                          | IPR026444                                                          | Type IX <sup>#</sup> ,<br>Sec/SPI <sup>&amp;</sup> |                       | Poru_00099                  | IPR026444<br>TIGR0483               | Type IX <sup>#</sup> ,<br>Sec/SPI <sup>&amp;</sup> |                       | 72.8%                 |
| <b>U32 Collagenase<sup>+</sup></b>               | Poras_0217                          | U32.003<br>PF12392<br>PF01136<br>IPR020988<br>IPR001539<br>PS01276 | N/A                                                | 29.3%                 | Poru_01540                  | PF01136<br>PF12392                  | N/A                                                | 29.0%                 | 90.6%                 |

|                                                                                                                                                                                                                                                                                                                                                                                                                                                                                                                                                                                                                                                                                                                                                                                                                                                                                                                                                                                                                                                                                                                                                                                                                                                                                                                                                                                                                                                                                                                                                                                           |            |                                            |     |  |            |                    |     |  |       |
|-------------------------------------------------------------------------------------------------------------------------------------------------------------------------------------------------------------------------------------------------------------------------------------------------------------------------------------------------------------------------------------------------------------------------------------------------------------------------------------------------------------------------------------------------------------------------------------------------------------------------------------------------------------------------------------------------------------------------------------------------------------------------------------------------------------------------------------------------------------------------------------------------------------------------------------------------------------------------------------------------------------------------------------------------------------------------------------------------------------------------------------------------------------------------------------------------------------------------------------------------------------------------------------------------------------------------------------------------------------------------------------------------------------------------------------------------------------------------------------------------------------------------------------------------------------------------------------------|------------|--------------------------------------------|-----|--|------------|--------------------|-----|--|-------|
|                                                                                                                                                                                                                                                                                                                                                                                                                                                                                                                                                                                                                                                                                                                                                                                                                                                                                                                                                                                                                                                                                                                                                                                                                                                                                                                                                                                                                                                                                                                                                                                           | Poras_0873 | PF01136<br>U32.003<br>IPR001539<br>PS01276 | N/A |  | Poru_00228 | PF01136<br>PF12392 | N/A |  | 97.3% |
| <p>All peptidases from <i>P. asaccharolytica</i> and <i>P. uenonis</i> were populated in UniProt using the advanced search tool to identify proteins with MEROPs annotations. Peptidases were cross-referenced against protein annotation identifiers in known and predicted microbial collagenases (BRENDA enzyme number: EC3.4.24.3) and the most promising candidate collagenases were selected by exploration of each entry in InterPro, Uniprot and MEROPS to identify important domains, secretion signals and predicted inhibitors. Any proteins involved in cell wall synthesis were eliminated.</p> <p>Predicted inhibitors (MEROPS): %Aprotinin, Bowman-Birk, Serpins; §1,10-phenanthroline, phosphoramidon, @Iodoacetamide, N-ethylmaleimide, + N/A</p> <p>^Collagenase IDs (BRENDA enzyme #: EC3.4.24.3, InterPro, Pfam or MEROPs IDs): IPR013783: Ig-like fold; IPR026444: C-term sec signal; TIGR04183: PorC sec signal; IPR024079: metallopeptidase catalytic domain; TIGR0483: Por sec system; PF01136; PF12392; U32.003: salmonella type collagenase; PF12392: Collagenase; PF01136: Peptidase U32; IPR020988: Peptidase U32, collagenase; IPR001539: Peptidase U23, bacterial collagenases; PS01276: Peptidase family U32; PF01136 Peptidase family U32; PF12392 collagenase</p> <p>#Type IX secretion determined by presence of IDs: TIGR0483, IPR026444, or PF18962 from TIGR Fam, InterPro and Pfam, in the protein C-terminus</p> <p>&amp;SignalP prediction</p> <p>*Clustal Omega multiple sequence alignment</p> <p>^Locus tags correspond to L215DRAFT_XXXXX</p> |            |                                            |     |  |            |                    |     |  |       |

945

946

947

948

949

950

951

952

953

954

## 955 References

- 956 1. van de Wiggert JH, Borgdorff H, Verhelst R, Crucitti T, Francis S, Verstraelen H, et al. The  
957 vaginal microbiota: what have we learned after a decade of molecular characterization? *PLoS One*.  
958 2014;9(8):e105998.
- 959 2. Ravel J, Gajer P, Abdo Z, Schneider GM, Koenig SS, McCulle SL, et al. Vaginal microbiome of  
960 reproductive-age women. *Proc Natl Acad Sci U S A*. 2011;108 Suppl 1:4680-7.
- 961 3. Onderdonk AB, Delaney ML, Fichorova RN. The Human Microbiome during Bacterial  
962 Vaginosis. *Clin Microbiol Rev*. 2016;29(2):223-38.
- 963 4. Cohen CR, Lingappa JR, Baeten JM, Ngayo MO, Spiegel CA, Hong T, et al. Bacterial vaginosis  
964 associated with increased risk of female-to-male HIV-1 transmission: a prospective cohort analysis  
965 among African couples. *PLoS Med*. 2012;9(6):e1001251.
- 966 5. Brotman RM, Klebanoff MA, Nansel TR, Yu KF, Andrews WW, Zhang J, et al. Bacterial  
967 vaginosis assessed by gram stain and diminished colonization resistance to incident gonococcal,  
968 chlamydial, and trichomonal genital infection. *J Infect Dis*. 2010;202(12):1907-15.
- 969 6. Myer L, Denny L, Telerant R, Souza M, Wright TC, Jr., Kuhn L. Bacterial vaginosis and  
970 susceptibility to HIV infection in South African women: a nested case-control study. *J Infect Dis*.  
971 2005;192(8):1372-80.
- 972 7. Hillier SL, Nugent RP, Eschenbach DA, Krohn MA, Gibbs RS, Martin DH, et al. Association  
973 between bacterial vaginosis and preterm delivery of a low-birth-weight infant. The Vaginal Infections  
974 and Prematurity Study Group. *N Engl J Med*. 1995;333(26):1737-42.
- 975 8. Fettweis JM, Serrano MG, Brooks JP, Edwards DJ, Girerd PH, Parikh HI, et al. The vaginal  
976 microbiome and preterm birth. *Nat Med*. 2019;25(6):1012-21.
- 977 9. Elovitz MA, Gajer P, Riis V, Brown AG, Humphrys MS, Holm JB, et al. Cervicovaginal  
978 microbiota and local immune response modulate the risk of spontaneous preterm delivery. *Nat Commun*.  
979 2019;10(1):1305.
- 980 10. Norenhag J, Du J, Olovsson M, Verstraelen H, Engstrand L, Brusselaers N. The vaginal  
981 microbiota, human papillomavirus and cervical dysplasia: a systematic review and network meta-  
982 analysis. *BJOG*. 2020;127(2):171-80.
- 983 11. Klein C, Kahesa C, Mwaiselage J, West JT, Wood C, Angeletti PC. How the Cervical  
984 Microbiota Contributes to Cervical Cancer Risk in Sub-Saharan Africa. *Front Cell Infect Microbiol*.  
985 2020;10:23.
- 986 12. Laniewski P, Barnes D, Goulder A, Cui H, Roe DJ, Chase DM, et al. Linking cervicovaginal  
987 immune signatures, HPV and microbiota composition in cervical carcinogenesis in non-Hispanic and  
988 Hispanic women. *Sci Rep*. 2018;8(1):7593.
- 989 13. Srinivasan S, Morgan MT, Liu C, Matsen FA, Hoffman NG, Fiedler TL, et al. More than meets  
990 the eye: associations of vaginal bacteria with gram stain morphotypes using molecular phylogenetic  
991 analysis. *PLoS One*. 2013;8(10):e78633.
- 992 14. Acuna-Amador L, Barloy-Hubler F. *Porphyromonas* spp. have an extensive host range in ill and  
993 healthy individuals and an unexpected environmental distribution: A systematic review and meta-  
994 analysis. *Anaerobe*. 2020;66:102280.
- 995 15. McClelland RS, Lingappa JR, Srinivasan S, Kinuthia J, John-Stewart GC, Jaoko W, et al.  
996 Evaluation of the association between the concentrations of key vaginal bacteria and the increased risk  
997 of HIV acquisition in African women from five cohorts: a nested case-control study. *Lancet Infect Dis*.  
998 2018;18(5):554-64.
- 999 16. Hillier SL, Krohn MA, Rabe LK, Klebanoff SJ, Eschenbach DA. The normal vaginal flora,  
1000 H<sub>2</sub>O<sub>2</sub>-producing lactobacilli, and bacterial vaginosis in pregnant women. *Clin Infect Dis*. 1993;16 Suppl  
1001 4:S273-81.

- 1002 17. Zozaya-Hinchliffe M, Lillis R, Martin DH, Ferris MJ. Quantitative PCR assessments of bacterial  
1003 species in women with and without bacterial vaginosis. *J Clin Microbiol.* 2010;48(5):1812-9.
- 1004 18. Delaney ML, Onderdonk AB. Nugent score related to vaginal culture in pregnant women. *Obstet*  
1005 *Gynecol.* 2001;98(1):79-84.
- 1006 19. Albert AY, Chaban B, Wagner EC, Schellenberg JJ, Links MG, van Schalkwyk J, et al. A Study  
1007 of the Vaginal Microbiome in Healthy Canadian Women Utilizing cpn60-Based Molecular Profiling  
1008 Reveals Distinct Gardnerella Subgroup Community State Types. *PLoS One.* 2015;10(8):e0135620.
- 1009 20. Schellenberg JJ, Links MG, Hill JE, Dumonceaux TJ, Kimani J, Jaoko W, et al. Molecular  
1010 definition of vaginal microbiota in East African commercial sex workers. *Appl Environ Microbiol.*  
1011 2011;77(12):4066-74.
- 1012 21. Holst E, Goffeng AR, Andersch B. Bacterial vaginosis and vaginal microorganisms in idiopathic  
1013 premature labor and association with pregnancy outcome. *J Clin Microbiol.* 1994;32(1):176-86.
- 1014 22. Petrina MAB, Cosentino LA, Wiesenfeld HC, Darville T, Hillier SL. Susceptibility of  
1015 endometrial isolates recovered from women with clinical pelvic inflammatory disease or histological  
1016 endometritis to antimicrobial agents. *Anaerobe.* 2019;56:61-5.
- 1017 23. Haggerty CL, Hillier SL, Bass DC, Ness RB. Bacterial vaginosis and anaerobic bacteria are  
1018 associated with endometritis. *Clin Infect Dis.* 2004;39(7):990-5.
- 1019 24. Chao X, Sun T, Wang S, Tan X, Fan Q, Shi H, et al. Research of the potential biomarkers in  
1020 vaginal microbiome for persistent high-risk human papillomavirus infection. *Ann Transl Med.*  
1021 2020;8(4):100.
- 1022 25. Chen Y, Qiu X, Wang W, Li D, Wu A, Hong Z, et al. Human papillomavirus infection and  
1023 cervical intraepithelial neoplasia progression are associated with increased vaginal microbiome diversity  
1024 in a Chinese cohort. *BMC Infect Dis.* 2020;20(1):629.
- 1025 26. Walther-Antonio MR, Chen J, Multinu F, Hokenstad A, Distad TJ, Cheek EH, et al. Potential  
1026 contribution of the uterine microbiome in the development of endometrial cancer. *Genome Med.*  
1027 2016;8(1):122.
- 1028 27. Summanen PH, Durmaz B, Vaisanen ML, Liu C, Molitoris D, Eerola E, et al. *Porphyromonas*  
1029 *somerae* sp. nov., a pathogen isolated from humans and distinct from *porphyromonas levii*. *J Clin*  
1030 *Microbiol.* 2005;43(9):4455-9.
- 1031 28. Eloe-Fadrosch EA, Rasko DA. The human microbiome: from symbiosis to pathogenesis. *Annu*  
1032 *Rev Med.* 2013;64:145-63.
- 1033 29. Yang HW, Huang YF, Chou MY. Occurrence of *Porphyromonas gingivalis* and *Tannerella*  
1034 *forsythensis* in periodontally diseased and healthy subjects. *J Periodontol.* 2004;75(8):1077-83.
- 1035 30. How KY, Song KP, Chan KG. *Porphyromonas gingivalis*: An Overview of Periodontopathic  
1036 Pathogen below the Gum Line. *Front Microbiol.* 2016;7:53.
- 1037 31. Hajishengallis G, Darveau RP, Curtis MA. The keystone-pathogen hypothesis. *Nat Rev*  
1038 *Microbiol.* 2012;10(10):717-25.
- 1039 32. Katz J, Yang QB, Zhang P, Potempa J, Travis J, Michalek SM, et al. Hydrolysis of epithelial  
1040 junctional proteins by *Porphyromonas gingivalis* gingipains. *Infect Immun.* 2002;70(5):2512-8.
- 1041 33. Takeuchi H, Sasaki N, Yamaga S, Kuboniwa M, Matsusaki M, Amano A. *Porphyromonas*  
1042 *gingivalis* induces penetration of lipopolysaccharide and peptidoglycan through the gingival epithelium  
1043 via degradation of junctional adhesion molecule 1. *PLoS Pathog.* 2019;15(11):e1008124.
- 1044 34. Ao M, Miyauchi M, Furusho H, Inubushi T, Kitagawa M, Nagasaki A, et al. Dental Infection of  
1045 *Porphyromonas gingivalis* Induces Preterm Birth in Mice. *PLoS One.* 2015;10(8):e0137249.
- 1046 35. Mougeot JC, Stevens CB, Paster BJ, Brennan MT, Lockhart PB, Mougeot FK. *Porphyromonas*  
1047 *gingivalis* is the most abundant species detected in coronary and femoral arteries. *J Oral Microbiol.*  
1048 2017;9(1):1281562.
- 1049 36. Katz J, Chegini N, Shiverick KT, Lamont RJ. Localization of *P. gingivalis* in preterm delivery  
1050 placenta. *J Dent Res.* 2009;88(6):575-8.

- 1051 37. McCuaig R, Wong D, Gardiner FW, Rawlinson W, Dahlstrom JE, Robson S. Periodontal  
1052 pathogens in the placenta and membranes in term and preterm birth. *Placenta*. 2018;68:40-3.
- 1053 38. Puertas A, Magan-Fernandez A, Blanc V, Revelles L, O'Valle F, Pozo E, et al. Association of  
1054 periodontitis with preterm birth and low birth weight: a comprehensive review. *J Matern Fetal Neonatal*  
1055 *Med*. 2018;31(5):597-602.
- 1056 39. Konishi H, Urabe S, Miyoshi H, Teraoka Y, Maki T, Furusho H, et al. Fetal Membrane  
1057 Inflammation Induces Preterm Birth Via Toll-Like Receptor 2 in Mice With Chronic Gingivitis. *Reprod*  
1058 *Sci*. 2019;26(7):869-78.
- 1059 40. Takii R, Kadowaki T, Tsukuba T, Yamamoto K. Inhibition of gingipains prevents  
1060 *Porphyromonas gingivalis*-induced preterm birth and fetal death in pregnant mice. *Eur J Pharmacol*.  
1061 2018;824:48-56.
- 1062 41. Imamura T. The role of gingipains in the pathogenesis of periodontal disease. *J Periodontol*.  
1063 2003;74(1):111-8.
- 1064 42. Mysak J, Podzimek S, Sommerova P, Lyuya-Mi Y, Bartova J, Janatova T, et al. *Porphyromonas*  
1065 *gingivalis*: major periodontopathic pathogen overview. *J Immunol Res*. 2014;2014:476068.
- 1066 43. Rafiei M, Kiani F, Sayehmiri F, Sayehmiri K, Sheikhi A, Zamanian Azodi M. Study of  
1067 *Porphyromonas gingivalis* in periodontal diseases: A systematic review and meta-analysis. *Med J Islam*  
1068 *Repub Iran*. 2017;31:62.
- 1069 44. Bedi GS, Williams T. Purification and characterization of a collagen-degrading protease from  
1070 *Porphyromonas gingivalis*. *J Biol Chem*. 1994;269(1):599-606.
- 1071 45. Potempa J, Sroka A, Imamura T, Travis J. Gingipains, the major cysteine proteinases and  
1072 virulence factors of *Porphyromonas gingivalis*: structure, function and assembly of multidomain protein  
1073 complexes. *Curr Protein Pept Sci*. 2003;4(6):397-407.
- 1074 46. Zhou J, Windsor LJ. *Porphyromonas gingivalis* affects host collagen degradation by affecting  
1075 expression, activation, and inhibition of matrix metalloproteinases. *J Periodontal Res*. 2006;41(1):47-54.
- 1076 47. Andrian E, Mostefaoui Y, Rouabhia M, Grenier D. Regulation of matrix metalloproteinases and  
1077 tissue inhibitors of matrix metalloproteinases by *Porphyromonas gingivalis* in an engineered human oral  
1078 mucosa model. *J Cell Physiol*. 2007;211(1):56-62.
- 1079 48. Kadowaki T, Yoneda M, Okamoto K, Maeda K, Yamamoto K. Purification and characterization  
1080 of a novel arginine-specific cysteine proteinase (argingipain) involved in the pathogenesis of periodontal  
1081 disease from the culture supernatant of *Porphyromonas gingivalis*. *J Biol Chem*. 1994;269(33):21371-8.
- 1082 49. Schenkein HA, Fletcher HM, Bodnar M, Macrina FL. Increased opsonization of a prtH-defective  
1083 mutant of *Porphyromonas gingivalis* W83 is caused by reduced degradation of complement-derived  
1084 opsonins. *J Immunol*. 1995;154(10):5331-7.
- 1085 50. Jagels MA, Ember JA, Travis J, Potempa J, Pike R, Hugli TE. Cleavage of the human C5A  
1086 receptor by proteinases derived from *Porphyromonas gingivalis*: cleavage of leukocyte C5a receptor.  
1087 *Adv Exp Med Biol*. 1996;389:155-64.
- 1088 51. Calkins CC, Platt K, Potempa J, Travis J. Inactivation of tumor necrosis factor-alpha by  
1089 proteinases (gingipains) from the periodontal pathogen, *Porphyromonas gingivalis*. Implications of  
1090 immune evasion. *J Biol Chem*. 1998;273(12):6611-4.
- 1091 52. Darveau RP, Belton CM, Reife RA, Lamont RJ. Local chemokine paralysis, a novel pathogenic  
1092 mechanism for *Porphyromonas gingivalis*. *Infect Immun*. 1998;66(4):1660-5.
- 1093 53. Scott CF, Whitaker EJ, Hammond BF, Colman RW. Purification and characterization of a potent  
1094 70-kDa thiol lysyl-proteinase (Lys-gingivain) from *Porphyromonas gingivalis* that cleaves kininogens  
1095 and fibrinogen. *J Biol Chem*. 1993;268(11):7935-42.
- 1096 54. Grenier D. Inactivation of human serum bactericidal activity by a trypsinlike protease isolated  
1097 from *Porphyromonas gingivalis*. *Infect Immun*. 1992;60(5):1854-7.
- 1098 55. Carlisle MD, Srikantha RN, Brogden KA. Degradation of human alpha- and beta-defensins by  
1099 culture supernatants of *Porphyromonas gingivalis* strain 381. *J Innate Immun*. 2009;1(2):118-22.

- 1100 56. Cauci S, Monte R, Driussi S, Lanzafame P, Quadrifoglio F. Impairment of the mucosal immune  
1101 system: IgA and IgM cleavage detected in vaginal washings of a subgroup of patients with bacterial  
1102 vaginosis. *J Infect Dis*. 1998;178(6):1698-706.
- 1103 57. Lewis WG, Robinson LS, Perry J, Bick JL, Peipert JF, Allsworth JE, et al. Hydrolysis of secreted  
1104 sialoglycoprotein immunoglobulin A (IgA) in ex vivo and biochemical models of bacterial vaginosis. *J*  
1105 *Biol Chem*. 2012;287(3):2079-89.
- 1106 58. Borgdorff H, Gautam R, Armstrong SD, Xia D, Ndayisaba GF, van Teijlingen NH, et al.  
1107 Cervicovaginal microbiome dysbiosis is associated with proteome changes related to alterations of the  
1108 cervicovaginal mucosal barrier. *Mucosal Immunol*. 2016;9(3):621-33.
- 1109 59. Doust R, Mobarez, AM. Collagenase activity in *Prevotella bivia* isolated from patients with  
1110 premature rupture of membranes. *Medical Journal of the Islamic Republic of Iran*. 2004;18(1):61-6.
- 1111 60. McGregor JA, Lawellin D, Franco-Buff A, Todd JK, Makowski EL. Protease production by  
1112 microorganisms associated with reproductive tract infection. *Am J Obstet Gynecol*. 1986;154(1):109-14.
- 1113 61. Steffen EK, Hentges DJ. Hydrolytic enzymes of anaerobic bacteria isolated from human  
1114 infections. *J Clin Microbiol*. 1981;14(2):153-6.
- 1115 62. Awano S, Ansai T, Mochizuki H, Yu W, Tanzawa K, Turner AJ, et al. Sequencing, expression  
1116 and biochemical characterization of the *Porphyromonas gingivalis* pepO gene encoding a protein  
1117 homologous to human endothelin-converting enzyme. *FEBS Lett*. 1999;460(1):139-44.
- 1118 63. Ansai T, Yu W, Urnowey S, Barik S, Takehara T. Construction of a pepO gene-deficient mutant  
1119 of *Porphyromonas gingivalis*: potential role of endopeptidase O in the invasion of host cells. *Oral*  
1120 *Microbiol Immunol*. 2003;18(6):398-400.
- 1121 64. Madeira F, Park YM, Lee J, Buso N, Gur T, Madhusoodanan N, et al. The EMBL-EBI search  
1122 and sequence analysis tools APIs in 2019. *Nucleic Acids Res*. 2019;47(W1):W636-W41.
- 1123 65. Rawlings ND, Barrett AJ, Thomas PD, Huang X, Bateman A, Finn RD. The MEROPS database  
1124 of proteolytic enzymes, their substrates and inhibitors in 2017 and a comparison with peptidases in the  
1125 PANTHER database. *Nucleic Acids Res*. 2018;46(D1):D624-D32.
- 1126 66. Schomburg I, Chang A, Schomburg D. BRENDA, enzyme data and metabolic information.  
1127 *Nucleic Acids Res*. 2002;30(1):47-9.
- 1128 67. Consortium TU. UniProt: the universal protein knowledgebase in 2021. *Nucleic Acids Res*.  
1129 2021;49(D1).
- 1130 68. Blum M, Chang HY, Chuguransky S, Grego T, Kandasamy S, Mitchell A, et al. The InterPro  
1131 protein families and domains database: 20 years on. *Nucleic Acids Res*. 2021;49(D1):D344-D54.
- 1132 69. Almagro Armenteros JJ, Tsirigos KD, Sonderby CK, Petersen TN, Winther O, Brunak S, et al.  
1133 SignalP 5.0 improves signal peptide predictions using deep neural networks. *Nat Biotechnol*.  
1134 2019;37(4):420-3.
- 1135 70. Chen IA, Chu K, Palaniappan K, Ratner A, Huang J, Huntemann M, et al. The IMG/M data  
1136 management and analysis system v.6.0: new tools and advanced capabilities. *Nucleic Acids Res*.  
1137 2021;49(D1):D751-D63.
- 1138 71. Srinivasan S, Munch MM, Sizova MV, Fiedler TL, Kohler CM, Hoffman NG, et al. More Easily  
1139 Cultivated Than Identified: Classical Isolation With Molecular Identification of Vaginal Bacteria. *J*  
1140 *Infect Dis*. 2016;214 Suppl 1:S21-8.
- 1141 72. McClelland RS, Lingappa JR, Srinivasan S, Kinuthia J, John-Stewart GC, Jaoko W, et al.  
1142 Evaluation of the association between the concentrations of key vaginal bacteria and the increased risk  
1143 of HIV acquisition in African women from five cohorts: a nested case-control study. *The Lancet*  
1144 *Infectious Diseases*. 2018;18(5):554-64.
- 1145 73. Parks DH, Chuvochina M, Chaumeil PA, Rinke C, Mussig AJ, Hugenholtz P. A complete  
1146 domain-to-species taxonomy for Bacteria and Archaea. *Nat Biotechnol*. 2020;38(9):1079-86.
- 1147 74. Pruesse E, Peplies J, Glockner FO. SINA: accurate high-throughput multiple sequence alignment  
1148 of ribosomal RNA genes. *Bioinformatics*. 2012;28(14):1823-9.

- 1149 75. Kumar S, Stecher G, Li M, Knyaz C, Tamura K. MEGA X: Molecular Evolutionary Genetics  
1150 Analysis across Computing Platforms. *Mol Biol Evol.* 2018;35(6):1547-9.
- 1151 76. Stamatakis A. RAxML version 8: a tool for phylogenetic analysis and post-analysis of large  
1152 phylogenies. *Bioinformatics.* 2014;30(9):1312-3.
- 1153 77. Letunic I, Bork P. Interactive Tree Of Life (iTOL) v5: an online tool for phylogenetic tree  
1154 display and annotation. *Nucleic Acids Research.* 2021.
- 1155 78. O'Flynn C, Deusch O, Darling AE, Eisen JA, Wallis C, Davis IJ, et al. Comparative Genomics of  
1156 the Genus *Porphyromonas* Identifies Adaptations for Heme Synthesis within the Prevalent Canine Oral  
1157 Species *Porphyromonas gingivalis*. *Genome Biol Evol.* 2015;7(12):3397-413.
- 1158 79. Gorasia DG, Veith PD, Chen D, Seers CA, Mitchell HA, Chen YY, et al. *Porphyromonas*  
1159 *gingivalis* Type IX Secretion Substrates Are Cleaved and Modified by a Sortase-Like Mechanism. *PLoS*  
1160 *Pathog.* 2015;11(9):e1005152.
- 1161 80. Bauer R, Janowska K, Taylor K, Jordan B, Gann S, Janowski T, et al. Structures of three  
1162 polycystic kidney disease-like domains from *Clostridium histolyticum* collagenases ColG and ColH.  
1163 *Acta Crystallogr D Biol Crystallogr.* 2015;71(Pt 3):565-77.
- 1164 81. Elliott SD. A Proteolytic Enzyme Produced by Group a Streptococci with Special Reference to  
1165 Its Effect on the Type-Specific M Antigen. *J Exp Med.* 1945;81(6):573-92.
- 1166 82. Matsuka YV, Pillai S, Gubba S, Musser JM, Olmsted SB. Fibrinogen cleavage by the  
1167 *Streptococcus pyogenes* extracellular cysteine protease and generation of antibodies that inhibit enzyme  
1168 proteolytic activity. *Infect Immun.* 1999;67(9):4326-33.
- 1169 83. Nelson DC, Garbe J, Collin M. Cysteine proteinase SpeB from *Streptococcus pyogenes* - a  
1170 potent modifier of immunologically important host and bacterial proteins. *Biol Chem.*  
1171 2011;392(12):1077-88.
- 1172 84. Takahashi N, Kato T, Kuramitsu HK. Isolation and preliminary characterization of the  
1173 *Porphyromonas gingivalis* prtC gene expressing collagenase activity. *FEMS Microbiol Lett.*  
1174 1991;68(2):135-8.
- 1175 85. Kato T, Takahashi N, Kuramitsu HK. Sequence analysis and characterization of the  
1176 *Porphyromonas gingivalis* prtC gene, which expresses a novel collagenase activity. *J Bacteriol.*  
1177 1992;174(12):3889-95.
- 1178 86. Park Y, Yilmaz O, Jung IY, Lamont RJ. Identification of *Porphyromonas gingivalis* genes  
1179 specifically expressed in human gingival epithelial cells by using differential display reverse  
1180 transcription-PCR. *Infect Immun.* 2004;72(7):3752-8.
- 1181 87. Wiggins R, Hicks S, Soothill P, Millar M, Corfield AJSti. Mucinases and sialidases: their role in  
1182 the pathogenesis of sexually transmitted infections in the female genital tract. 2001;77(6):402-8.
- 1183 88. Olmsted SS, Meyn LA, Rohan LC, Hillier SL. Glycosidase and proteinase activity of anaerobic  
1184 gram-negative bacteria isolated from women with bacterial vaginosis. *Sex Transm Dis.* 2003;30(3):257-  
1185 61.
- 1186 89. Briselden AM, Moncla BJ, Stevens CE, Hillier SL. Sialidases (neuraminidases) in bacterial  
1187 vaginosis and bacterial vaginosis-associated microflora. *J Clin Microbiol.* 1992;30(3):663-6.
- 1188 90. Howe L, Wiggins R, Soothill PW, Millar MR, Horner PJ, Corfield AP. Mucinase and sialidase  
1189 activity of the vaginal microflora: implications for the pathogenesis of preterm labour. *Int J STD AIDS.*  
1190 1999;10(7):442-7.
- 1191 91. Lewis WG, Robinson LS, Gilbert NM, Perry JC, Lewis AL. Degradation, foraging, and  
1192 depletion of mucus sialoglycans by the vagina-adapted Actinobacterium *Gardnerella vaginalis*. *J Biol*  
1193 *Chem.* 2013;288(17):12067-79.
- 1194 92. Wiggins R, Crowley T, Horner PJ, Soothill PW, Millar MR, Corfield AP. Use of 5-bromo-4-  
1195 chloro-3-indolyl-alpha-D-N-acetylneuraminic acid in a novel spot test To identify sialidase activity in  
1196 vaginal swabs from women with bacterial vaginosis. *J Clin Microbiol.* 2000;38(8):3096-7.

- 1197 93. Moncla BJ, Braham P, Hillier SL. Sialidase (neuraminidase) activity among gram-negative  
1198 anaerobic and capnophilic bacteria. *J Clin Microbiol.* 1990;28(3):422-5.
- 1199 94. Zhang X, Xu X, Li J, Li N, Yan T, Ju X. [Relationship between vaginal sialidase bacteria  
1200 vaginosis and chorioamnionitis]. *Zhonghua Fu Chan Ke Za Zhi.* 2002;37(10):588-90.
- 1201 95. Smayevsky J, Canigia LF, Lanza A, Bianchini H. Vaginal microflora associated with bacterial  
1202 vaginosis in nonpregnant women: reliability of sialidase detection. *Infect Dis Obstet Gynecol.*  
1203 2001;9(1):17-22.
- 1204 96. Sumeksri P, Kopraserit C, Panichkul S. BVBLUE test for diagnosis of bacterial vaginosis in  
1205 pregnant women attending antenatal care at Phramongkutklao Hospital. *J Med Assoc Thai.* 2005;88  
1206 Suppl 3:S7-13.
- 1207 97. Myziuk L, Romanowski B, Johnson SC. BVBlue test for diagnosis of bacterial vaginosis. *J Clin*  
1208 *Microbiol.* 2003;41(5):1925-8.
- 1209 98. Oefner CM, Sharkey A, Gardner L, Critchley H, Oyen M, Moffett A. Collagen type IV at the  
1210 fetal-maternal interface. *Placenta.* 2015;36(1):59-68.
- 1211 99. Strauss JF, 3rd. Extracellular matrix dynamics and fetal membrane rupture. *Reprod Sci.*  
1212 2013;20(2):140-53.
- 1213 100. Tang LJ, De Seta F, Odreman F, Venge P, Piva C, Guaschino S, et al. Proteomic analysis of  
1214 human cervical-vaginal fluids. *J Proteome Res.* 2007;6(7):2874-83.
- 1215 101. Dasari S, Pereira L, Reddy AP, Michaels JE, Lu X, Jacob T, et al. Comprehensive proteomic  
1216 analysis of human cervical-vaginal fluid. *J Proteome Res.* 2007;6(4):1258-68.
- 1217 102. Wang NY, Patras KA, Seo HS, Cavaco CK, Rosler B, Neely MN, et al. Group B streptococcal  
1218 serine-rich repeat proteins promote interaction with fibrinogen and vaginal colonization. *J Infect Dis.*  
1219 2014;210(6):982-91.
- 1220 103. Harris TO, Shelver DW, Bohnsack JF, Rubens CE. A novel streptococcal surface protease  
1221 promotes virulence, resistance to opsonophagocytosis, and cleavage of human fibrinogen. *J Clin Invest.*  
1222 2003;111(1):61-70.
- 1223 104. Katz D, Beilin Y. Disorders of coagulation in pregnancy. *Br J Anaesth.* 2015;115 Suppl 2:ii75-  
1224 88.
- 1225 105. Kadir R, Chi C, Bolton-Maggs P. Pregnancy and rare bleeding disorders. *Haemophilia.*  
1226 2009;15(5):990-1005.
- 1227 106. Cortet M, Deneux-Tharaux C, Dupont C, Colin C, Rudigoz RC, Bouvier-Colle MH, et al.  
1228 Association between fibrinogen level and severity of postpartum haemorrhage: secondary analysis of a  
1229 prospective trial. *Br J Anaesth.* 2012;108(6):984-9.
- 1230 107. Ness PM, Budzynski AZ, Olexa SA, Rodvien R. Congenital hypofibrinogenemia and recurrent  
1231 placental abruption. *Obstet Gynecol.* 1983;61(4):519-23.
- 1232 108. Evron S, Anteby SO, Brzezinsky A, Samueloff A, Eldor A. Congenital afibrinogenemia and  
1233 recurrent early abortion: a case report. *Eur J Obstet Gynecol Reprod Biol.* 1985;19(5):307-11.
- 1234 109. Goodwin TM. Congenital hypofibrinogenemia in pregnancy. *Obstet Gynecol Surv.*  
1235 1989;44(3):157-61.
- 1236 110. Kobayashi T, Kanayama N, Tokunaga N, Asahina T, Terao T. Prenatal and peripartum  
1237 management of congenital afibrinogenemia. *Br J Haematol.* 2000;109(2):364-6.
- 1238 111. Woessner JF, Brewer TH. Formation and Breakdown of Collagen and Elastin in the Human  
1239 Uterus during Pregnancy and Post-Partum Involution. *Biochem J.* 1963;89:75-82.
- 1240 112. Montoya TI, Maldonado PA, Acevedo JF, Word RA. Effect of vaginal or systemic estrogen on  
1241 dynamics of collagen assembly in the rat vaginal wall. *Biol Reprod.* 2015;92(2):43.
- 1242 113. Kerkhof MH, Hendriks L, Brolmann HA. Changes in connective tissue in patients with pelvic  
1243 organ prolapse--a review of the current literature. *Int Urogynecol J Pelvic Floor Dysfunct.*  
1244 2009;20(4):461-74.



- 1245 114. Minamoto T, Arai K, Hirakawa S, Nagai Y. Immunohistochemical studies on collagen types in  
1246 the uterine cervix in pregnant and nonpregnant states. *Am J Obstet Gynecol.* 1987;156(1):138-44.
- 1247 115. Myers K, Socrate S, Tzeranis D, House M. Changes in the biochemical constituents and  
1248 morphologic appearance of the human cervical stroma during pregnancy. *Eur J Obstet Gynecol Reprod*  
1249 *Biol.* 2009;144 Suppl 1:S82-9.
- 1250 116. Myers KM, Paskaleva AP, House M, Socrate S. Mechanical and biochemical properties of  
1251 human cervical tissue. *Acta Biomater.* 2008;4(1):104-16.
- 1252 117. Uldbjerg N, Ekman G, Malmstrom A, Olsson K, Ulmsten U. Ripening of the human uterine  
1253 cervix related to changes in collagen, glycosaminoglycans, and collagenolytic activity. *Am J Obstet*  
1254 *Gynecol.* 1983;147(6):662-6.
- 1255 118. Osmers R, Rath W, Adelman-Grill BC, Fittkow C, Severenyi M, Kuhn W. Collagenase activity  
1256 in the cervix of non-pregnant and pregnant women. *Arch Gynecol Obstet.* 1990;248(2):75-80.
- 1257 119. Rath W, Adelman-Grill BC, Pieper U, Kuhn W. Collagen degradation in the pregnant human  
1258 cervix at term and after prostaglandin-induced cervical ripening. *Arch Gynecol.* 1987;240(3):177-84.
- 1259 120. Gonzalez JM, Dong Z, Romero R, Girardi G. Cervical remodeling/ripening at term and preterm  
1260 delivery: the same mechanism initiated by different mediators and different effector cells. *PLoS One.*  
1261 2011;6(11):e26877.
- 1262 121. Parry S, Strauss JF, 3rd. Premature rupture of the fetal membranes. *N Engl J Med.*  
1263 1998;338(10):663-70.
- 1264 122. Jones HE, Harris KA, Azizia M, Bank L, Carpenter B, Hartley JC, et al. Differing prevalence  
1265 and diversity of bacterial species in fetal membranes from very preterm and term labor. *PLoS One.*  
1266 2009;4(12):e8205.
- 1267 123. Wang H, Ogawa M, Wood JR, Bartolomei MS, Sammel MD, Kusanovic JP, et al. Genetic and  
1268 epigenetic mechanisms combine to control MMP1 expression and its association with preterm premature  
1269 rupture of membranes. *Hum Mol Genet.* 2008;17(8):1087-96.
- 1270 124. McLaren J, Taylor DJ, Bell SC. Increased concentration of pro-matrix metalloproteinase 9 in  
1271 term fetal membranes overlying the cervix before labor: implications for membrane remodeling and  
1272 rupture. *Am J Obstet Gynecol.* 2000;182(2):409-16.
- 1273 125. Skinner SJ, Campos GA, Liggins GC. Collagen content of human amniotic membranes: effect of  
1274 gestation length and premature rupture. *Obstet Gynecol.* 1981;57(4):487-9.
- 1275 126. McGregor JA, French JI, Lawellin D, Franco-Buff A, Smith C, Todd JK. Bacterial protease-  
1276 induced reduction of chorioamniotic membrane strength and elasticity. *Obstet Gynecol.* 1987;69(2):167-  
1277 74.
- 1278 127. Chopra A, Radhakrishnan R, Sharma M. *Porphyromonas gingivalis* and adverse pregnancy  
1279 outcomes: a review on its intricate pathogenic mechanisms. *Crit Rev Microbiol.* 2020;46(2):213-36.
- 1280 128. Wu YM, Chen LL, Yan J, Zhuang CY, Gu ZY. Effect of *Porphyromonas gingivalis* PrtC on  
1281 cytokine expression in ECV304 endothelial cells and its level in subgingival plaques from patients with  
1282 chronic periodontitis. *Acta Pharmacol Sin.* 2007;28(7):1015-23.
- 1283 129. Houle MA, Grenier D, Plamondon P, Nakayama K. The collagenase activity of *Porphyromonas*  
1284 *gingivalis* is due to Arg-gingipain. *FEMS Microbiol Lett.* 2003;221(2):181-5.
- 1285 130. Kuramitsu HK, Yoneda M, Madden T. Proteases and collagenases of *Porphyromonas gingivalis*.  
1286 *Adv Dent Res.* 1995;9(1):37-40.
- 1287 131. Bhattacharya S, Bhattacharya S, Gachhui R, Hazra S, Mukherjee J. U32 collagenase from  
1288 *Pseudoalteromonas agarivorans* NW4327: Activity, structure, substrate interactions and molecular  
1289 dynamics simulations. *Int J Biol Macromol.* 2019;124:635-50.
- 1290 132. Wu Q, Li C, Li C, Chen H, Shuliang L. Purification and characterization of a novel collagenase  
1291 from *Bacillus pumilus* Col-J. *Appl Biochem Biotechnol.* 2010;160(1):129-39.
- 1292 133. Filep JG. Endothelin peptides: biological actions and pathophysiological significance in the lung.  
1293 *Life Sci.* 1993;52(2):119-33.

- 1294 134. Noveral JP, Rosenberg SM, Anbar RA, Pawlowski NA, Grunstein MM. Role of endothelin-1 in  
1295 regulating proliferation of cultured rabbit airway smooth muscle cells. *Am J Physiol.* 1992;263(3 Pt  
1296 1):L317-24.
- 1297 135. Pritchard GG, Freebairn AD, Coolbear T. Purification and characterization of an endopeptidase  
1298 from *Lactococcus lactis* subsp. *cremoris* SK11. *Microbiology (Reading).* 1994;140 ( Pt 4):923-30.
- 1299 136. Christensson C, Bratt H, Collins LJ, Coolbear T, Holland R, Lubbers MW, et al. Cloning and  
1300 expression of an oligopeptidase, PepO, with novel specificity from *Lactobacillus rhamnosus* HN001  
1301 (DR20). *Appl Environ Microbiol.* 2002;68(1):254-62.
- 1302 137. Agarwal V, Kuchipudi A, Fulde M, Riesbeck K, Bergmann S, Blom AM. *Streptococcus*  
1303 *pneumoniae* endopeptidase O (PepO) is a multifunctional plasminogen- and fibronectin-binding protein,  
1304 facilitating evasion of innate immunity and invasion of host cells. *J Biol Chem.* 2013;288(10):6849-63.
- 1305 138. Agarwal V, Sroka M, Fulde M, Bergmann S, Riesbeck K, Blom AM. Binding of *Streptococcus*  
1306 *pneumoniae* endopeptidase O (PepO) to complement component C1q modulates the complement attack  
1307 and promotes host cell adherence. *J Biol Chem.* 2014;289(22):15833-44.
- 1308 139. Shu Z, Yuan J, Wang H, Zhang J, Li S, Zhang H, et al. *Streptococcus pneumoniae* PepO  
1309 promotes host anti-infection defense via autophagy in a Toll-like receptor 2/4 dependent manner.  
1310 *Virulence.* 2020;11(1):270-82.
- 1311 140. Zhang H, Kang L, Yao H, He Y, Wang X, Xu W, et al. *Streptococcus pneumoniae*  
1312 Endopeptidase O (PepO) Elicits a Strong Innate Immune Response in Mice via TLR2 and TLR4  
1313 Signaling Pathways. *Front Cell Infect Microbiol.* 2016;6:23.
- 1314 141. Wilkening RV, Chang JC, Federle MJ. PepO, a CovRS-controlled endopeptidase, disrupts  
1315 *Streptococcus pyogenes* quorum sensing. *Mol Microbiol.* 2016;99(1):71-87.
- 1316 142. Honda-Ogawa M, Sumitomo T, Mori Y, Hamd DT, Ogawa T, Yamaguchi M, et al.  
1317 *Streptococcus pyogenes* Endopeptidase O Contributes to Evasion from Complement-mediated  
1318 Bacteriolysis via Binding to Human Complement Factor C1q. *J Biol Chem.* 2017;292(10):4244-54.  
1319  
1320  
1321  
1322  
1323  
1324  
1325  
1326  
1327  
1328  
1329  
1330  
1331  
1332  
1333  
1334  
1335  
1336  
1337  
1338  
1339  
1340  
1341
